# 1 **Flagellin FLiC Enhances Resistance of Upland Cotton to *Verticillium*** 2 ***dahliae***

3 Heng Zhou<sup>1</sup>, Yijing Xie<sup>1</sup>, Yi Wang<sup>1</sup>, Heqin Zhu<sup>2\*</sup>, Canming Tang<sup>1\*</sup>

4 1 State Key Laboratory of Crop Genetics and Germplasm Enhancement, College of  
5 Agriculture, Nanjing Agricultural University, 210095 Nanjing, China.

6 2 State Key Laboratory of Cotton Biology, Institute of Cotton Research of Chinese  
7 Academy of Agricultural Sciences, Anyang, 455000 Henan, China.

8 \*Author for correspondence: Heqin Zhu, Email: heqinanyang@163.com.

9 Canming Tang, Email: tangcm@njau.edu.cn.

## 10 **Abstract:**

11 The mechanism by which flagellin induces an immune response in plants is still unclear.  
12 The purpose of this study is to reveal the effect and mechanism of flagellin in inducing  
13 plants to produce an immune response to increase the resistance to *Verticillium dahliae*  
14 (VD). The full-length flagellin gene C (FliC) was cloned from an endophytic bacteria  
15 (*Pseudomonas*) in the root of upland cotton cultivar Zhongmiansuo 41. The FliC protein  
16 purified in vitro has 47.50% and 32.42% biocontrol effects on resistant and susceptible  
17 cotton cultivars, respectively. FLiC can induce allergic reactions in tobacco leaf cells and  
18 immune responses in cotton plants. Smearing FLiC to cotton and performing RNA-seq  
19 analysis, it is significantly enriched in the activity of positive ion transporters such as  
20 potassium ions and calcium ions (Ca<sup>2+</sup>), diterpenoid biosynthesis, phenylpropane  
21 biosynthesis and other disease-resistant metabolic pathways. FLiC inhibits the expression  
22 of calcium antiporter activity gene (*GhCAA*) to accelerate intracellular Ca<sup>2+</sup> influx and  
23 stimulate the increase of intracellular hydrogen peroxide (H<sub>2</sub>O<sub>2</sub>) and nitric oxide (NO)  
24 content. The coordinated regulation of Ca<sup>2+</sup>, H<sub>2</sub>O<sub>2</sub> and NO enhances disease resistance. The  
25 resistance of transgenic *FLiC* gene Arabidopsis to VD was significantly improved. The  
26 *FLiC* gene can be used as an anti-VD gene and as a regulator to improve resistance to VD.

27

28 **Key words:** Flagellin, immune response, *Verticillium dahliae*, Ca<sup>2+</sup>, RNA-seq

29

30 **Abbreviations:** 2-DDG: 2-deoxy-D-glucose; AOPP:  $\alpha$ -aminoxyacetic acid- $\beta$   
31 -phenylpropionic acid; Ca<sup>2+</sup>: calcium ions; H<sub>2</sub>O<sub>2</sub>: hydrogen peroxide; NO: nitric oxide;  
32 *GhCAA*: calcium antiporter activity gene; PTI: pattern triggered immunity; ETI: effector

33 triggered immunity; ROS: reactive oxygen species; SA: Salicylic acid; JA: Jasmonic acid;  
34 IPTG: isopropyl- $\beta$ -D thiogalactopyranoside; PMSF: phenylmethanesulphonyl fluoride;  
35 PVP: polyvinyl pyrrolidone; CHI: chitinase; GLU: glucanase; PAL: Phenylalanine  
36 ammonia lyase; PPO: polyphenoloxidase; POD: Peroxidase; CAT: catalase; qRT-PCR:  
37 quantitative reverse transcriptase-PCR; DAB: 3,3'-diaminobenzidine; CAT: catalase;  
38 C-PTIO: carboxy-2-phenyl-4,4,5,5-tetramethylimidazoline-3-oxide-1-oxyl); L-NAME:  
39 nitro-L-arginine methyl ester; EGTA: ethylene glycol-bis(2-aminoethyl  
40 ether)-N,N,N',N'-tetraacetic acid; VD: *Verticillium dahliae*; *PR1*: disease-related protein 1;  
41 *LOX*: lipoxygenase; *VSP*: vegetative storage protein; *GPX7*: glutathione peroxidase;  
42 *GSTU3*: glutathione sulfur transfer Enzyme gene; *FLiC*: full-length flagellin gene C.

43

## 44 **Introduction:**

45 Immune response is closely related to the disease resistance of plants. Plants mainly  
46 rely on two levels of defense pathways to resist infection by pathogens: pathogenic  
47 microorganisms pattern triggered immunity (PTI) (Nürnberger and Brunner, 2002) and  
48 pathogens secreted effector triggered immunity (ETI) (Thomma et al., 2011; Naveed et al.,  
49 2020). The defense response is realized by mutual recognition and interaction between the  
50 recognition receptors of plants and the elicitors secreted by pathogenic microorganisms.  
51 Through the transmission and transduction of a series of signals to activate the immune  
52 defense response in the plant, and finally make the plant obtain systemic disease resistance  
53 (Jennings et al., 2001; Bouizgarne et al., 2006; Jones et al., 2006; Kumar et al., 2020). The  
54 early defense reactions of plants mainly include the production of early disease resistance  
55 signals such as allergic reactions, reactive oxygen species (ROS) outbreaks, and NO  
56 accumulation. These stimulus signals are converted from extracellular to intracellular  
57 signals and amplified by a cascade reaction to induce downstream defense reactions. These  
58 reactions always occur first around the infected tissue and gradually spread to the  
59 surrounding uninfected tissues. In the end, the immune system of the entire plant is  
60 activated to defend against the infection of various pathogens (Dixon et al.,1994; Ebel et  
61 al.,1998; Yano et al.,1998; Durrant et al., 2004; Buxdorf et al., 2013; Holmes et al., 2021).

62 Flagellin can induce immune responses in rice, algae and kelp but the mechanism is  
63 unclear (Takai et al., 2008; Wang, 2012; Wang et al., 2013). The flagellin Flg22 cloned  
64 from *Pseudomonas syringae* is a 22-amino acid peptide conserved at the N-terminus, which  
65 acts as an active site for elicitor to induce immune responses in higher plants (Felix et al.,  
66 1999). After being induced by flagellin, plants will produce a series of defense responses,  
67 including ethylene (ETH) production, callose deposition, ROS burst, defense gene  
68 expression and growth inhibition (Asai et al., 2002; Zipfel et al., 2004). Flg22 is mainly  
69 based on salicylic acid (SA) signal transduction pathway, and also related to jasmonic acid  
70 (JA) or ethylene signal transduction pathway (Gómez-Gómez et al., 2000; Yuan et al.,  
71 2020). Activated SA and JA signaling pathways have an effect on the ROS burst and  
72 callose deposition triggered by Flg22 (Yi et al., 2014). The effect and mechanism of  
73 exogenous protein and Flg22 in inducing the immune response of upland cotton have not  
74 been studied.

75 *Verticillium wilt* of cotton is mainly a soil-borne vascular disease caused by VD. It  
76 seriously affects cotton yield and fiber quality and lacks effective control measures. The  
77 effect and mechanism of exogenous protein inducing immune response in cotton to  
78 increase resistance to VD has not been reported. In this study, a full-length flagellin gene  
79 *FliC* was cloned from cotton endophytic bacteria (*Pseudomonas*). The purpose of this study  
80 was to study the effect and mechanism of this protein in inducing cotton immune response  
81 and improving resistance to VD.

## 82 **Materials and Methods**

### 83 **Microbial strains and cotton cultivar**

84 VD were generously provided by the Institute of Plant Protection, Jiansu Academy of  
85 Agriculture Sciences. Hygromycin B-resistant GFP-labelled VD was provided by Hu (2012)  
86 and maintained on potato dextrose agar (PDA) at 25°C. For the inoculation assay, conidia  
87 from 10-day-old PDA plates inoculated with the V1070 were washed once with sterile  
88 water and diluted to a concentration of  $10^7$  conidia mL<sup>-1</sup>. The expression vector Pgex-4T-2  
89 and *Escherichia coli* expression competent cell *E.coli* BL21 (DE3) was purchased from  
90 Beijing Kinco Xinye Biotechnology Co., Ltd. The tested tobacco variety was *Nicotiana*

91 *tabacum* cv. Xanthi NN, which was cultivated in a greenhouse at 25°C to the 7-8 leaf stage.  
92 The tested cotton varieties were the VD-susceptible variety Jimian 11 and the  
93 disease-resistant cotton variety Zhongzhimian 2.

94

## 95 **Construction of *FliC* gene expression vector**

96 Using P<sub>gex</sub>-4T-2 as an expression vector and designing a pair of specific primers  
97 based on the *FliC* gene sequence:

98 *FliC*-BamHI-F: 5'- CGCGGATCCATGGCCTTGACCGTCAACAC-3'

99 *FliC*-EcoRI-R: 5'- CCGGAATTCTTAGCGCAGCAGGCTCAGAAC-3'

100 PCR reaction system: *FliC*-BamHI-F: 2.0 μL; *FliC*-EcoRI-R: 2.0 μL; Gold Mix (green):  
101 45.0 μL; Plasmid: 1.0 μL with a total volume of 50.0 μL. PCR amplification conditions:  
102 pre-denaturation at 98°C for 2 min; denaturation at 98°C for 10 s, annealing at 62°C for 30  
103 s, extension at 72°C for 10 s, 35 cycles; extension at 72°C for 2 min. Finally, perform  
104 agarose gel electrophoresis detection (1.5% agarose, 120V, 20 min). Use TAKARA gel  
105 recovery kit to recover the amplified products. The recovered product and P<sub>gex</sub>-4T-2 were  
106 digested at 37°C for 5 hours. Use T4 ligase to ligate overnight at 16°C. PCR detection  
107 conditions of bacterial solution: pre-denaturation at 98°C for 2 min; denaturation at 98°C  
108 for 10 s, annealing at 55°C for 30 s, extension at 72°C for 20 s, 35 cycles; extension at  
109 72°C for 1 min. The recombinant expression plasmid *FliC*- P<sub>gex</sub>-4T-2 verified by PCR  
110 amplification, restriction enzyme digestion and sequencing was transformed into competent  
111 cells of E.coli BL21(DE3) for prokaryotic expression.

112

## 113 **Induced expression of recombinant protein FLiC**

114 Pick a single colony of the positive strain, inoculate 5 mL in a fresh LB liquid medium  
115 containing 50 mg/L ampicillin, and culture with shaking at 37°C until the OD<sub>600</sub> is 0.6-0.8.  
116 Add isopropyl-β-D thiogalactopyranoside (IPTG) with a final concentration of 0.5 mM,  
117 and continue shaking culture at 150 rpm for 5 hours at 28°C. Polyacrylamide gel  
118 electrophoresis (SDS-PAGE) detection, with non-induced bacterial liquid and BL21 (DE3)  
119 bacterial liquid as controls.

120

## 121 **FLiC protein allergic reaction test**

122 Using 5-6 true leaf tobacco seedlings as experimental materials, 50  $\mu\text{L}$  (100  $\mu\text{g}/\text{mL}$ ) of  
123 purified protein was injected into the mesophyll from the back of the leaf, GST as controls,  
124 and each treatment was repeated 3 times(Felix et al.,1999; Gómez-Gómez et al., 2000)。

## 125 **Detection of disease resistance of FLiC to cotton cultivars**

126 Four-leaf stage seedlings of uniformly growing disease-resistant cotton varieties  
127 (Zhongzhimian 2) and susceptible varieties (Jimian 11) were selected, and FLiC at a  
128 concentration of 50  $\mu\text{g}/\text{mL}$  was uniformly smeared to treat cotton seedling leaves. Water is  
129 used as a control. After treatment for 2 days, inoculate the pathogenic spore suspension ( $2$   
130  $\times 10^7$  cfu/mL). The method of inoculation of the pathogen is as follows: remove the cotton  
131 seedlings, soak the roots in the pathogen spore suspension for 20 minutes, inoculate 15  
132 strains of each cotton cultivar with sterile water as the control. 15 days after inoculation,  
133 the incidence of cotton was counted. At the same time, observe the infection of disease  
134 bacteria in cotton roots, stems and leaves during this period under a microscope. The  
135 condition was investigated 30 days after inoculation, and all experiments were repeated 3  
136 times.

137

## 138 **Lignin detection**

139 According to Pomar's method, Wiesner reagent is used to detect the content of lignin  
140 (Pomar et al., 2002). Each treatment is repeated three times.

## 141 **callose detection**

142 Refer to Millet's method for corpus callosum detection (Millet et al., 2010). The  
143 quantification of callose is calculated by Image J software. Each treatment was repeated  
144 three times.

145

## 146 **Biomass detection of VD**

147 Cut two cotyledons from cotton of different treatment groups in a sterile environment,

148 weigh and add 2 mL of sterile water for grinding. After grinding into a homogenate, it is  
149 diluted according to the method of gradient dilution. 100  $\mu$ L of diluents of different  
150 concentrations were spread on the red bengal resistant medium containing 50  $\mu$ g/mL  
151 hygromycin and 50  $\mu$ g/mL streptomycin, and then placed in a 28°C constant temperature  
152 incubator and cultured upside down for 2 days. Count the number of colonies in each petri  
153 dish and calculate the content of VD per gram of leaf. All experiments were repeated three  
154 times (Wang, 2014) .

155

### 156 **Chitinase(CHI) and glucanase(GLU) detection**

157 Enzyme extracts from cotyledon were prepared in 0.2 M boric acid-borax buffer, pH  
158 7.6 with 0.1% (v/v)  $\beta$ -mercaptoethanol, 0.57 mM phenylmethanesulphonyl fluoride  
159 (PMSF) and 1% (w/v) polyvinyl pyrrolidone (PVP) and 50 mM potassium acetate buffer  
160 (pH 5.0) for CHI and GLU, respectively. The homogenate was centrifuged at 12,000 $\times$  g for  
161 20 min at 4°C and the supernatant served as enzyme source. CHI activity was measured  
162 according to the protocol described by Emani et al (2003) using 4-methylumbelliferyl- $\beta$ -  
163 -D-N, N''-triacetylchitotrioside [4-MU- $\beta$ -(GlucNAc)<sub>3</sub>] (Sigma, St. Louis, MO, USA) as  
164 the substrate. Enzyme extract were further diluted (16-fold) with 0.1 M citrate buffer, pH  
165 3.0 prior to the enzyme assay. One hundred microlitres of diluted protein extract were  
166 mixed with 25  $\mu$ L of substrate (250  $\mu$ M) and incubated at 30°C for 1 h. The reaction was  
167 terminated with 1 mL of 0.2 M sodium carbonate and fluorescence was measured using a  
168 DyNA Quant™ 200 fluorometer (Hoefer). The endochitinase activity is presented as pmole  
169 4-MU/h/mg protein. Each assay was carried out in three replicates.

170 The GLU assay was performed using the method of Abeles and Forrence (1970).  
171 Laminarin was used as the substrate and dinitrosalicylic reagent was used to measure the  
172 reducing sugars produced in the enzymatic reaction. 0.5 mL enzyme extract was routinely  
173 added to 0.5 mL of 2% (w/v) laminarin in water and incubated at 50°C for 1 or 2 h. The  
174 laminarin was dissolved by heating the 2% solution briefly in a boiling water bath before  
175 use. The reaction was stopped by adding 3 mL of the dinitrosalicylic reagent and heating  
176 the tubes for 5 min at 100°C. The tubes were then cooled to 25°C, the contents were diluted

177 1:10 with water, and the optical density was read at 500 nm. The enzyme activity is  
178 expressed as glucose equivalents, mg/h/mg protein. Each assay was carried out in three  
179 replicates.

## 180 **Phenylalanine ammonia lyase (PAL) and polyphenoloxidase (PPO)** 181 **detection**

182 Enzyme extracts from cotyledon were prepared in 0.1 M sodium borate buffer, pH 7.0  
183 containing 0.1 g insoluble PVP and 0.1M sodium phosphate buffer (pH 6.5) for PAL assays  
184 and PPO, respectively. The homogenate was centrifuged at 12,000×g for 20 min at 4°C  
185 and the supernatant served as enzyme source. Samples containing 0.4 mL of enzyme  
186 extract were incubated with 0.5 mL of 0.1 M borate buffer, pH 8.8, and 0.5 mL of 12 mM  
187 L-phenylalanine in the same buffer for 30 min at 30°C. PAL activity was determined as the  
188 rate of conversion of L-phenylalanine to trans-cinnamic acid at 290 nm as described by  
189 Dickerson et al (1984) and was expressed as nmoles of cinnamic acid unit min/mg protein.

190 The method for determining the activity of PPO is slightly modified with reference to  
191 the method of Ali et al (2006). Add 1 mL of 0.05 mol/L phosphate buffer (pH 5.5) to the  
192 0.2g leaves uniformly ground with liquid nitrogen, shake and mix, and centrifuge at 4° C,  
193 12000rpm for 15min. Take 0.5 mL of the supernatant enzyme solution and add 1.0 mL of  
194 0.1 M catechol solution and 1.5 mL of 0.05 mol/L pH 5.5 phosphate buffer, the total  
195 volume is 3 mL. After mixing uniformly, measure the absorbance at 398 nm every 2  
196 minutes, and use 0.05 mol/L (pH 5.5) phosphate buffer as a control. Take  $\Delta A_{398}/\Delta t$   
197 =0.01/min to express an enzyme activity unit (U). Each assay was carried out in three  
198 replicates

199

## 200 **Peroxidase (POD) and catalase (CAT) detection**

201 Enzyme extracts from cotyledon were prepared in 50 mM Tris-HCl buffer, pH 7.0.  
202 The extract was centrifuged at 12 000 g for 20 min at 4°C. The supernatant was passed  
203 through a Sephadex G-25 column and fractions containing enzyme were pooled and used  
204 as enzyme source for the assay of catalase and POD by Sudhakar et al (2001).  
205 The determination of peroxidase activity is slightly modified according to the method of  
206 Dong et al (2003). Add 0.2g of the leaves uniformly ground with liquid nitrogen to 1mL of



207 0.1M pH 5.5 phosphate buffer, shake and mix well, and centrifuge at 4° C at 12000rpm for  
208 15min. Take 0.1mL of the supernatant enzyme solution and add 2.9mL of 0.05mol/L  
209 phosphate buffer, 1mL of 0.05mol/L guaiacol and 1mL of 2% H<sub>2</sub>O<sub>2</sub>. Measure the  
210 absorbance value at 470 nm immediately after mixing, and the change of A<sub>470</sub> by 0.01 per  
211 minute is 1 peroxidase activity unit (u). Each assay was carried out in three replicates.

212 CAT activity was measured using the method of Plazek and Zur (2003) with a  
213 modification. CAT activity was assayed in reaction mixture (3 cm<sup>3</sup> final volume) composed  
214 of 50 mM Tris-HCl buffer pH 7.0 to which 30% (w/v) H<sub>2</sub>O<sub>2</sub> was added to reach an  
215 absorbance value in the range 0.520 - 0.550 ( $\lambda$  =240 nm). The reaction was started after  
216 adding 200  $\mu$ L of crude extracts to the reaction mixture. CAT activity was measured as a  
217 decrease in absorbance at 240 nm as a consequence of H<sub>2</sub>O<sub>2</sub> consumption. Activity of the  
218 enzyme was expressed as mmol H<sub>2</sub>O<sub>2</sub> decomposed per minute per milligram of protein.  
219 Each assay was carried out in three replicates.

## 220 **RNA extraction and gene expression analysis by quantitative reverse** 221 **transcriptase-PCR (qRT-PCR)**

222 Leaves were collected and transcript analysis was conducted at different time points as  
223 indicated in the figures. Analyses were performed by quantitative qRT-PCR. RNA  
224 extraction and gene expression analysis were performed as previously described by Ren et  
225 al (2013) with slight modifications. Total RNA was extracted using an RNA Isolation Kit  
226 (Omega Bio-Tek) according to the manufacturer's instructions. First-strand complementary  
227 DNA was synthesized from total RNA using a PrimeScript<sup>TM</sup> RT reagent kit with gDNA  
228 Eraser (Takara, China). Then, 5  $\mu$ L of 1:10 diluted cDNA samples was used as the  
229 qRT-PCR template with 0.5  $\mu$ M gene-specific primers and 10  $\mu$ L SYBR Premix Ex Taq II  
230 (Takara, China) in a total volume of 20  $\mu$ L. Experiments were performed in a Realplex2  
231 Systems (Eppendorf, Germany) with the following thermal cycling profile: 95°C for 10 min,  
232 followed by 40 cycles of 95°C for 30 s, 55°C for 30 s, and 72°C for 30 s. Each real-time  
233 assay was tested in a dissociation protocol to ensure that each amplicon was a single  
234 product. Sequences of cotton defense gene primers were used for RT-qPCR (Supplemental  
235 Table S1). Relative gene expression of genes was calculated by the threshold cycle  $2^{-\Delta\Delta CT}$



236 method by Livak and Schmittgen (2001) from three biological replicates and three  
 237 technical replicates. For each gene, the mean fold-change  $\pm$  SD in transcript accumulation  
 238 within treated leaves relative to the control (set at 1.0) was calculated from three biological  
 239 replicates.

240 Supplemental Table S1 Primer sets used for quantitative real-time PCR

| Primer        | Sequence                                             | Ref        | Gene                                               |
|---------------|------------------------------------------------------|------------|----------------------------------------------------|
| <i>CHI</i>    | ACCAAGCTACTCGCAAGAGG'<br>CGGAAGCGCAGTAAGATGA         | CD485880   | Pathogen induced<br>class1 chitinase               |
| <i>GLU</i>    | CATTGATATGACCTTGATCG<br>GTGAGATATCCCTTGGATTG         | CD486342   | Pathogen induced<br>glucanase                      |
| <i>HMG</i>    | GATTTGAAGTTGTATTTGGAG<br>GAAATCAGTTTGAAGGAAA         | CD486522   | Pathogen induced<br>HMG CoA reductase              |
| <i>LOX</i>    | AGTCGTCGGTTCATGCCTGAGAAA<br>ATTCCCAGGAGTGTCTGCAGTTGA | Han, 2014  | Pathogen induced<br>lipoxygenase                   |
| <i>POD4</i>   | TTTGCTGTGCCATGGTGAAGATG<br>CAATCAGTTGACCACCCTGCAGTT  | AF155124   | Pathogen induced<br>peroxidase                     |
| <i>PR1</i>    | TGCCCAAGACTCACAACAAG<br>GGCCTTCTCATTAACCCACA         | Han, 2014  | Putative PR1                                       |
| <i>ERF5</i>   | GCTCAAGCCGGTTTAAATATGGGT<br>TTCACCACATGTACAAGGTCCCAC | Han, 2014  | Bacterial-induced<br>ERF5 gene                     |
| <i>CDN1</i>   | GCCAACTTGTGGTTATGCCATGCT<br>TGCTGAGCAATCGTCTTCTCTCCT | Han, 2014  | Terpenoid aldehydes<br>and cadalene<br>derivitives |
| <i>PR10</i>   | ATGATTGAAGGTCGGCCTTTAGGG<br>CAGCTGCCACAACTGGTTCTCAT  | Han, 2014  | Putative PR10                                      |
| <i>MAPK2</i>  | TTACAATCTTATTCCACACACGC<br>TCCCTATTTATAGAAAACCTCCC   | DQ132852.1 | Mitogen-activated<br>protein kinase                |
| <i>MAPK6</i>  | GGACACTGAGATGGCGGAGC<br>ACCAATGGGCATAATAGGAG         | JF727638.1 | Mitogen-activated<br>protein kinase                |
| <i>MAPK7</i>  | CAGAGCAAATATGCCGTATG<br>TTACAATCTTATTCCACACACGC      | FJ966888.1 | Mitogen-activated<br>protein kinase                |
| <i>MAPK16</i> | GTGTTGTTTGTTCAGCGTATG<br>CGTAGGAGCCTGAGAAGTTTA       | FJ966889.1 | Mitogen-activated<br>protein kinase                |

---

|                 |                                                 |            |                           |
|-----------------|-------------------------------------------------|------------|---------------------------|
| <i>WRKY2</i>    | TTCTTCCCATAATACCATCC<br>CTCGCATAAACTGTTAGCATC   | DQ864758.1 | Transcription factor      |
| <i>WRKY3</i>    | GGGACGAAAGTTGTCAAAGGGAA<br>TCGTGTTGCTGTTTCGGTTG | FJ966887.1 | Transcription factor      |
| <i>WRKY4</i>    | ATTGATAACAACCTTACGAGGGC<br>TTGAGGAGCAAGGAAGGATT | JQ081265.1 | Transcription factor      |
| <i>WRKY5</i>    | GCAAAGGGAACCGAGATT<br>ATCGGGTAGGGATGCTTG        | JQ081266.1 | Transcription factor      |
| <i>WRKY6</i>    | AAGCCAATCAAGGGTTCTCC<br>GTTCTTCCAAGCACCTCTCT    | JQ081267.1 | Transcription factor      |
| <i>18S rRNA</i> | CCATAAACGATGCCGACCAG<br>AGCCTTGCGACCATACTCCC    | HQ658359.1 | 18S ribosomal RNA<br>gene |

---

241

## 242 **Measurement of cytosolic Ca<sup>2+</sup> concentration**

243 To measure cytosolic calcium concentration, epidermal strips of four-week-old cotton  
244 leaves were loaded with the Ca<sup>2+</sup>-sensitive fluorescent dye 1-[2-amino-5-(2,  
245 7-dichloro-6-hydroxy-3-oxo-9-xanthenyl) phenoxy]-2-(2-amino-5-methylphenoxy) ethane-  
246 N, N, N', N' -tetraacetic acid, pentaacetoxymethyl ester (Fluo-3/AM) (Molecular Probes,  
247 Eugene, OR, USA), which was observed with the laser-scanning confocal microscopy  
248 (LSCM) according to the method described by Chen et al (2004). The cotton epidermal  
249 strips were incubated in 10 μM Fluo-3 AM loading buffer (10 mM MES-Tris, pH 6.1) at  
250 4°C for 2 h in darkness. After incubation at 4°C for 2 h in the dark, the epidermal strips  
251 were washed twice with anisotonic solution and incubated at 25°C for 1 h in the dark. The  
252 epidermal peels loaded with Fluo-3/AM were exposed to FLiC (100 μg/mL) and distilled  
253 water (control) for 12 min. Fluorescent probes were excited with a 488 nm laser, and the  
254 emission fluorescence was filtered by a 515 nm filter to eliminate the autofluorescence of  
255 the epidermal strips. Images were recorded every 20 s. Images were analyzed using Leica  
256 IMAGE software. All of the experiments were repeated three times, and the Ca<sup>2+</sup> fluxes of  
257 6 horizons of epidermal cells were measured in each treatment at each time. Pictures were  
258 taken by scanning the field of view three times each 20 s; then, the fluorescence intensities

259 of these pictures were measured by fluorescence microscopy after establishing a stable  
260 baseline.

## 261 **H<sub>2</sub>O<sub>2</sub> detection and quantification**

262 Detection of H<sub>2</sub>O<sub>2</sub> was also performed based on the method described by Kumar et al  
263 (2009) with slight modifications. The leaves were harvested and placed in a solution  
264 containing 1 mg mL<sup>-1</sup> 3, 3' -diaminobenzidine (DAB) (pH 3.8) for 8 h under light at 25°C.  
265 The leaves were boiled in ethanol (96%, v/v) for 10 min and then stored in 96% ethanol.  
266 H<sub>2</sub>O<sub>2</sub> production was visualized as a reddish-brown coloration of the leave. The  
267 concentration of H<sub>2</sub>O<sub>2</sub> in plant leaves was measured by monitoring the A<sub>415</sub> of the  
268 titanium-peroxide complex following the method described by Brennan and Frenkel (1977).  
269 Absorbance values were calibrated to a standard curve generated with known  
270 concentrations of H<sub>2</sub>O<sub>2</sub>. The total H<sub>2</sub>O<sub>2</sub> content was recalculated for 1 g of fresh weight of  
271 plant leaves.

## 272 **NO detection and quantification**

273 The levels of NO in cotton leaves were determined with the Griess reagent kit  
274 (Beyotime Institute Biotech) described by Li et al (2010) with slight modifications. The  
275 optical density at 550 nm of the reaction product was measured with a UV mini-1240  
276 spectrophotometer (Shimadzu, Japan). The production of NO (mol g<sup>-1</sup> of fresh weight) was  
277 calculated with a formula supplied in the kit. There were three replicates in each treatment.  
278 Nitric oxide in cotton epidermal cell was visualized using the specific NO probes 3-Amino,  
279 4-aminomethyl-2', 7' -difluorescein diacetate 4, 5-diaminofluorescein diacetate (DAF-FM  
280 DA, Sigma-Aldrich) (Sun et al., 2012) using the method described by Bright et al(2006) .  
281 FLiC or inhibitors as indicated the figures or figures legends, and then incubated in  
282 MES-KCl buffer (10 mM MES, 5 mM KCl, 50 µM CaCl<sub>2</sub>, pH 6.15) and DAF-FM DA at a  
283 final concentration of 10 M for 30 min in the dark at 25°C, followed by washing twice in  
284 the same MES-KCl buffer for 15 min each. All images were visualized using CLSM  
285 (excitation 488 nm, emission 515 nm). Images acquired were analyzed using Leica IMAGE  
286 software. All treatment s were repeated three times. The data are presented as the average

287 fluorescence intensity.

288

## 289 **Transcriptome Differential Gene Significance Screening Conditions**

290

291 Define the genes with  $|\log_2FC| \geq 1$  and P-value  $\leq 0.05$ , and screen them as  
292 significantly differentially expressed genes. The significant enrichment conditions of  
293 metabolic pathways are used to calculate the P-value by the hypergeometric distribution  
294 method (the standard for significant enrichment is P-value  $< 0.05$ ).

295

## 296 **Primer design for qRT-PCR verification of transcriptome results**

297 According to the results of RNA-seq sequencing, 12 genes were randomly selected to  
298 design gene-specific primers by NCBI and verified by qRT-PCR (Supplemental Table S2).

299 The relevant primer designs are as follows:

300

301 Supplemental Table S2 Specific primer sequences of qRT-PCR related genes

| Gene name          | Primer sequence ( 5'→3')     |                          |
|--------------------|------------------------------|--------------------------|
| <i>GH_D07G1376</i> | F:GTTGGTCACGACCGAGGAG;       | R:AGCCCTCTTGAAATTAGCCCC  |
| <i>GH_D09G0121</i> | F:GGTCTTTATTTATTGTGACAGGTGG; | R:GCTGGTGGAAATGGAAAACCG  |
| <i>GH_A11G1348</i> | F:ACAGGCAGCATACTAGGTGG;      | R:TCCTCTAGCTCTTGGCCCTT   |
| <i>GH_A02G0915</i> | F:GCAGTCGACATCACAAAACCTC;    | R:GGCCTCCACTACGGACTCTT   |
| <i>GH_A08G0063</i> | F:ACCTATACCTGGCGAGTTTTG;     | R:AATCCACCCAACCACAACACA  |
| <i>GH_D08G0067</i> | F:ACCTATACCTGGCGAGTTTTG;     | R:AATCCACCCAACCACAACACA  |
| <i>GH_A09G1367</i> | F:CCGCTGGAGGTAGGAAAAGG;      | R:CGATTTCTTCGCCCGGTTTC   |
| <i>GH_D03G1291</i> | F:AACACTGATGCAGAAGGTAGG;     | R:TGTTGCCAGGTCAAGATGTCTA |
| <i>GH_A13G0836</i> | F:CCATCTTCTCCCTCTTGGCA;      | R:AAGCTGGGTTACAAGGCAAG   |
| <i>GH_D01G0069</i> | F:GTGTCTGGCTTTGTCTGCTGTA;    | R:CTTCGATCGATGCAAACGACA  |
| <i>GH_D10G0737</i> | F:ACTCCTTGTTACCAGCCGAAA;     | R:CTCTGTGAAGACAAGCTGCC   |
| <i>GH_A10G0542</i> | F:AGTTCGTCCAAGCGAAGGAG;      | R:TCTTCAACCCCGCTTTACC    |
| <i>ubiquitin</i>   | F:GAGTCTTCGGACACCATTG;       | R:CTTGACCTTCTTCTTCTTGTGC |

302

## 303 **Statistical analysis**

304 All experiments and data provided in this paper were repeated at least three times. The  
305 resulting data were subjected to an analysis of variance using GraphPad Prism software  
306 version 4.0 and SPSS 19.0 software (SPSS Inc.). Student's unpaired t test and Student -

307 Newman - Keuls (S - N - K) test ( $P < 0.05$ ) were used to determine the significance of the  
308 differences observed between the samples.

## 309 **Results**

### 310 **The structure and allergic reaction of flagellin FLiC**

311 FLiC protein is flagellin and has two functional domains (Figure 1A). It has  
312 three-dimensional structure (Fig. 1B). The homology with *Pseudomonas aeruginosa* PA103  
313 is 100% (Figure 1C). The recombinant plasmid was transformed into *E. coli* BL21 (DE3)  
314 strain, and induced by Isopropyl-  $\beta$  -D-thiogalactopyranoside (IPTG) (0.5 mM) at 28°C for  
315 5 h. The purified FLiC protein was 66 kDa (Figure 1, D and E). FLiC protein induces  
316 hypersensitive reaction and reactive oxygen species in tobacco leaves (Figure 1, F and G).

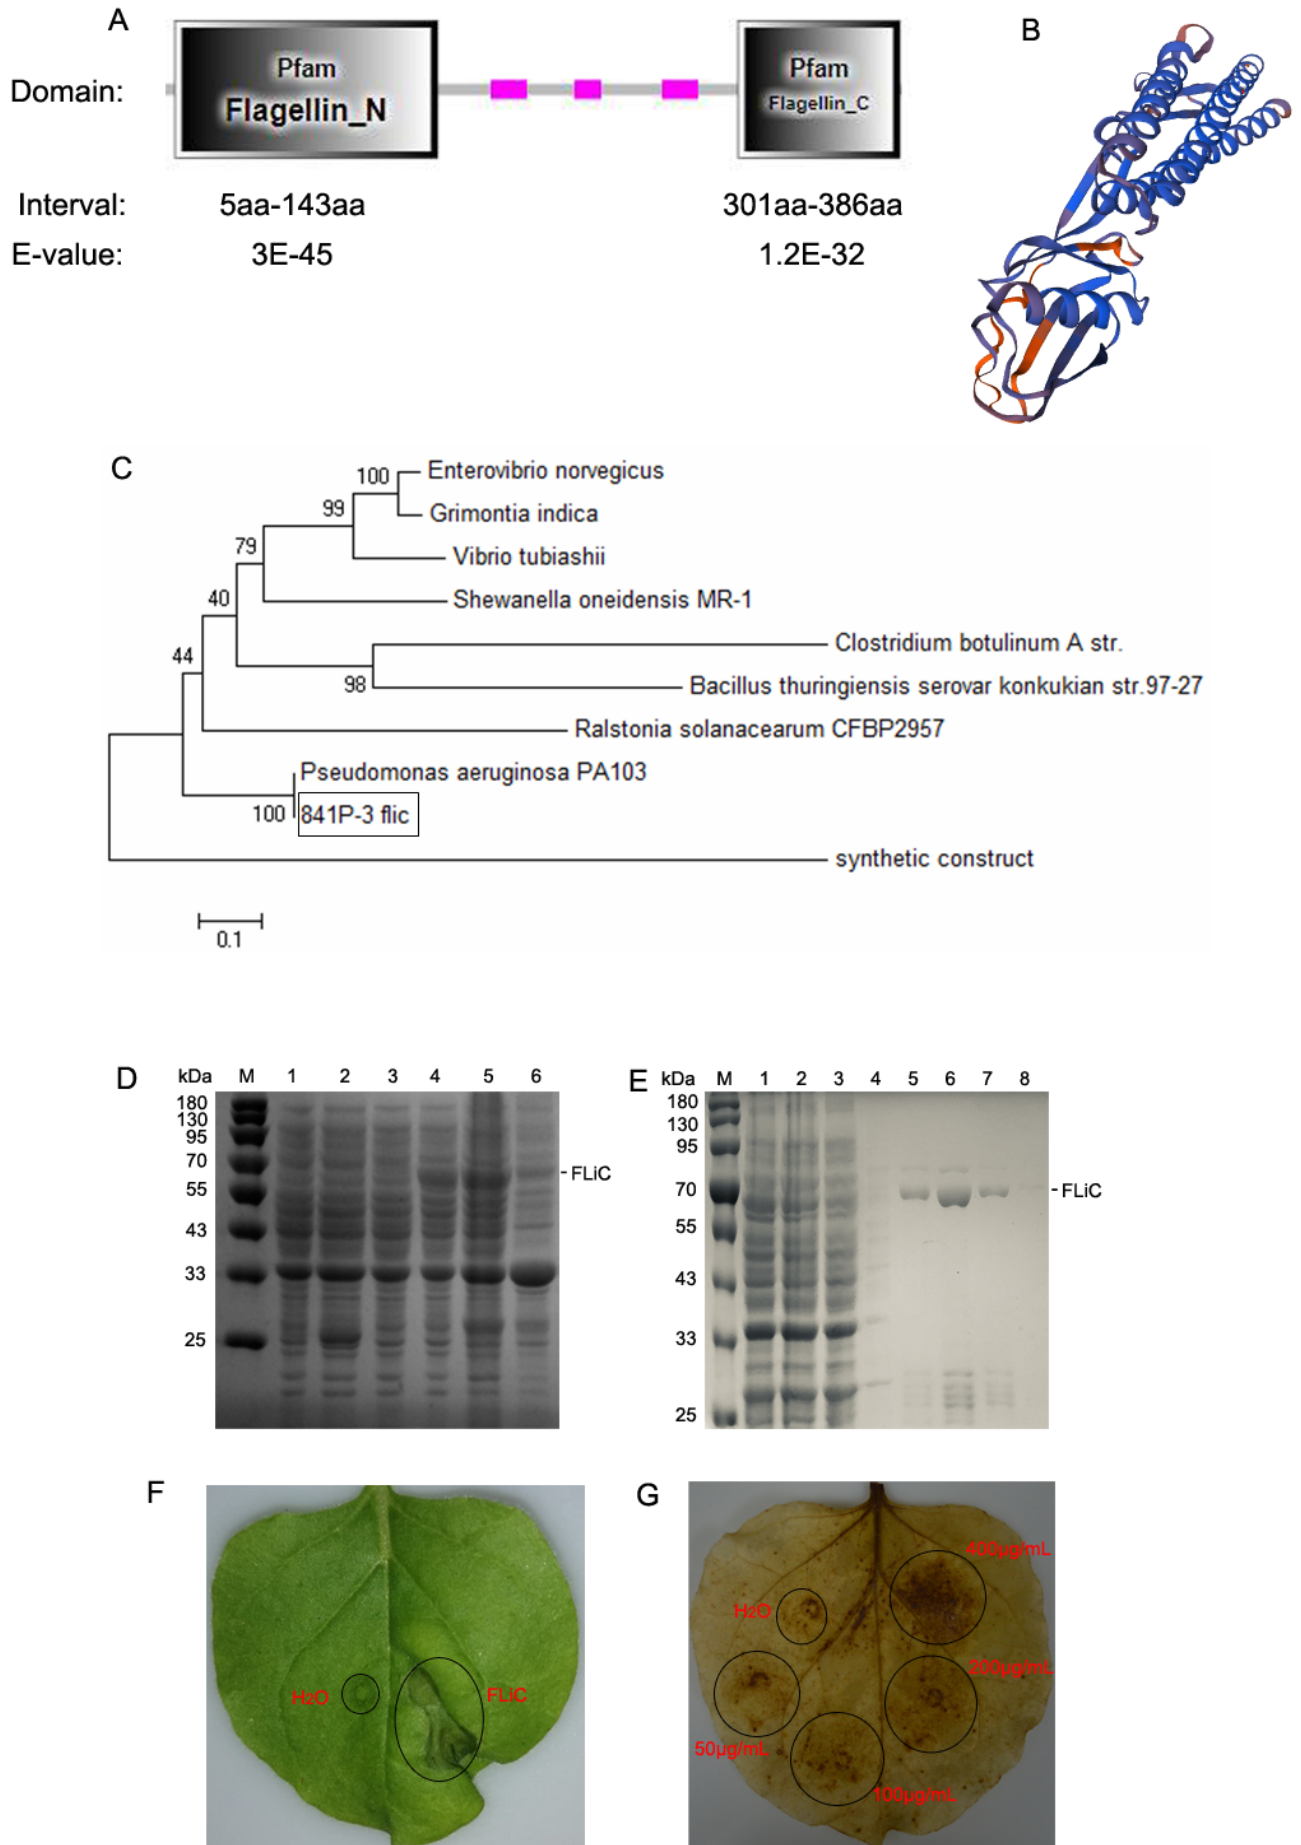

318 **Figure 1** The structure and allergic reaction of flagellin FLiC  
319 A, two functional domains of FLiC protein; B, three-dimensional structure diagram of FLiC protein;  
320 C, evolutionary tree of FLiC protein; D: Expression of FLiC recombinant protein in *E. coli* at 28°C;  
321 M: protein marker; 1: control containing empty vector; 2: empty vector with the addition of inducer  
322 (0.5 mM IPTG); 3: Whole bacteria added with inducer (0 mM IPTG); 4: Whole bacteria added with  
323 inducer (0.5 mM IPTG); 5: The supernatant part after the bacterial cell is broken; 6: The part that  
324 settles after the bacterial cell is broken. E: purified FLiC protein; M: protein marker; 1: cell lysate;  
325 2: flow through; 3: wash1; 4: wash2; 5: elution1; 6: elution2; 7: elution3; 8: elution4. F:  
326 hypersensitive reaction(HR) of FLiC on tobacco; G: reactive oxygen species (ROS) generated  
327 after treatment with different FLiC protein concentration,  
328

### 329 **FLiC induces resistance of cotton to VD**

330 After smearing Jimian 11 and Zhongzhimian 2 with FLiC protein, the amount of VD  
331 in roots, stems and leaves was significantly lower than that in the control group, indicating  
332 that FLiC can induce resistance to the infection of VD (Figure 2). The incidence of resistant  
333 varieties was lower than that of susceptible varieties. After 30 days of FLiC treatment, the  
334 disease index of resistant varieties was lower than that of susceptible varieties. The relative  
335 biocontrol effects of FLiC on resistant and susceptible cotton varieties were 47.50% and  
336 32.42% respectively (Table 1). Therefore, FLiC can not only induce systemic disease  
337 resistance in cotton, but the induction effect of resistant varieties is stronger than that of  
338 susceptible varieties.



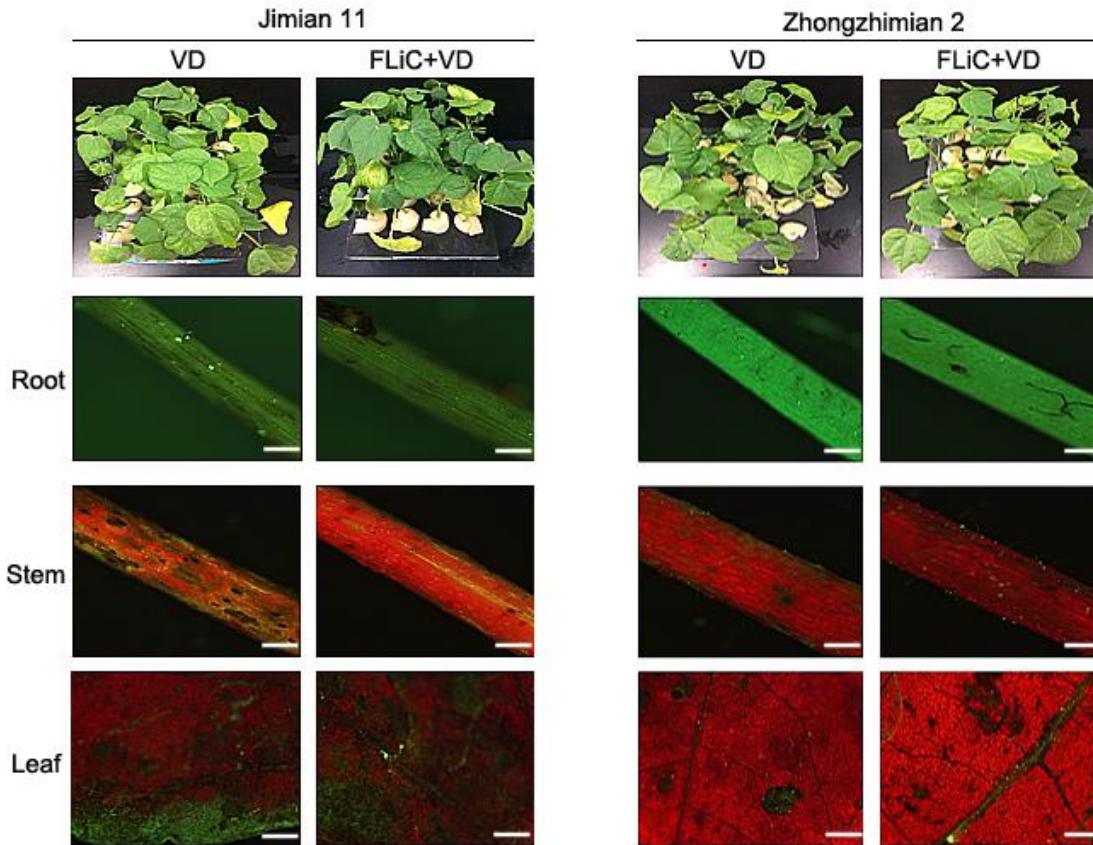

Figure 2 The effect of FLiC on the infection of VD in Jimian 11 and Zhongzhimian 2

Table 1 FLiC induces disease resistance of different cotton varieties (30 d)

| Treatment             | Disease index(DI) | Relative control effect (%) |
|-----------------------|-------------------|-----------------------------|
| Jimian 11 (CK)        | 68.41±0.61a       |                             |
| Jimian 11 (FLiC)      | 46.23±1.12c       | 32.42±1.39b                 |
| Zhongzhimian 2 (CK)   | 55.28±0.61b       |                             |
| Zhongzhimian 2 (FLiC) | 29.00±0.83d       | 47.50±2.09a                 |

Note: Different letters indicate significant at the 0.05 level.

### FLiC induces H<sub>2</sub>O<sub>2</sub> accumulation in cotton

After FLiC and VD treated cotton leaves for 24 hours, a large amount of H<sub>2</sub>O<sub>2</sub> could be clearly detected. Pretreatment of FLiC protein before VD treatment can induce more H<sub>2</sub>O<sub>2</sub> deposition. However, the accumulation of H<sub>2</sub>O<sub>2</sub> in Jimian 11 was less than that of Zhongzhimian 2. Therefore, FLiC can induce the outbreak of H<sub>2</sub>O<sub>2</sub> in the leaves to induce the defense response of cotton, and the immune response of resistant varieties is stronger than that of susceptible varieties (Supplemental Figure S1).

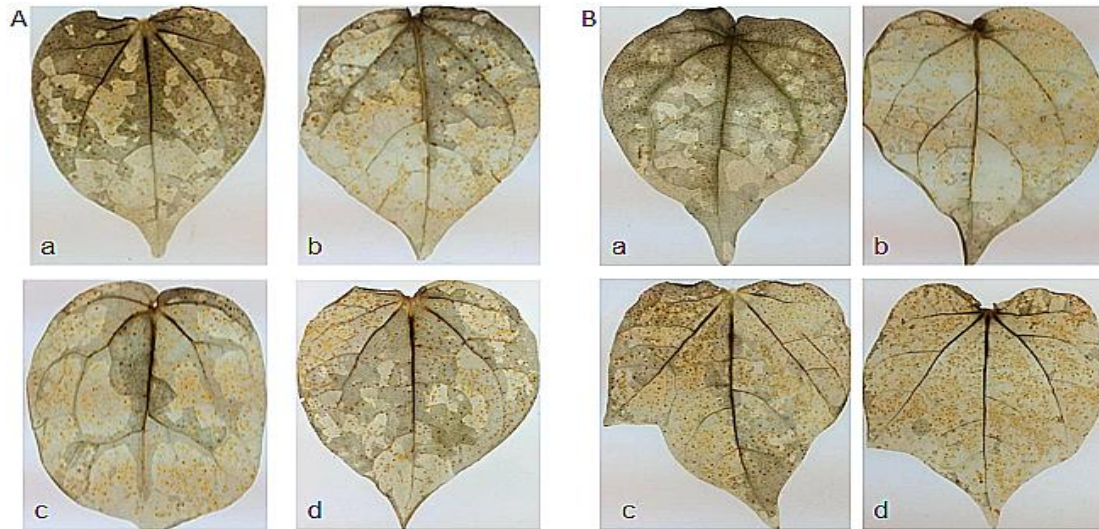

351  
352 Supplemental Figure S1 FLiC induced the deposition of H<sub>2</sub>O<sub>2</sub> in Jimian 11(A) and Zhongzhimian  
353 2(B) leaves

354 a: Control; b: VD treatment; c: FLiC treatment; d: FLiC+VD treatment

355

### 356 **FLiC induces the accumulation of callose in cotton**

357 After FLiC treatment, both Jimian 11 and Zhongzhimian 2 can detect the obvious blue  
358 fluorescent substance (Supplemental Figure S2). VD and FLiC treatments had little  
359 difference in the corpus callosin content of Jimian 11, but significant difference in  
360 Zhongzhimian 2. Pretreatment of FLiC before VD inoculation, resistant and susceptible  
361 varieties produced a large amount of callus, and the induced resistance of resistant varieties  
362 was higher than that of susceptible varieties. Therefore, FLiC can induce cotton leaves to  
363 produce callose to enhance plant disease resistance.

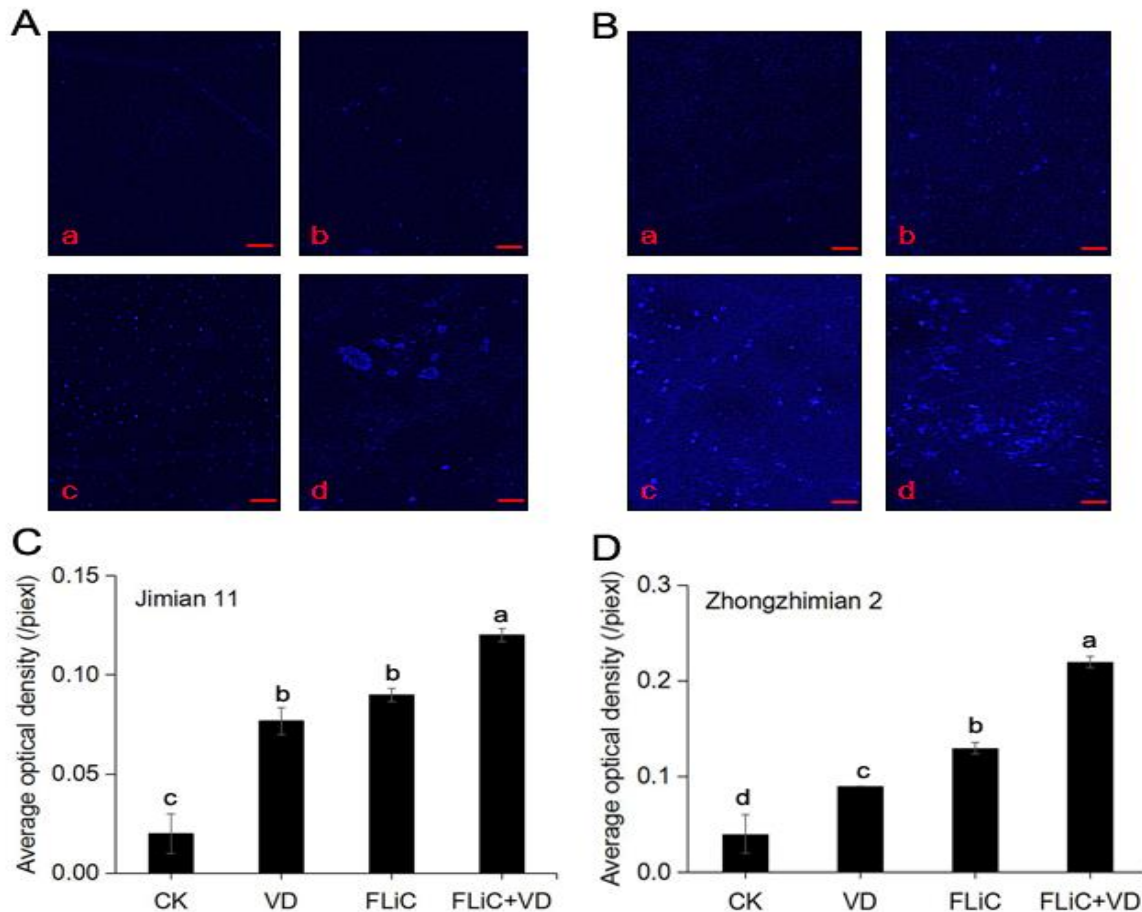

364  
365 Supplemental Figure S2 FLiC-induced callose deposition in Jimian 11(A) and Zhongzhimian 2(B)  
366 leaves; a: Control; b: VD treatment; c: FLiC treatment; d: FLiC+VD treatment; C: FLiC protein induces  
367 the average optical density of Jimian 11 to accumulate callose; D: FLiC protein induces the average  
368 optical density of Zhongzhimian 2 to accumulate callose; different letters indicate significant at the 0.05  
369 level.

370

### 371 **FLiC-induced resistance depends on changes in related enzyme activities**

372 After FLiC treatment of Jimian 11 and Zhongzhimian 2 cotton seedlings, the activities  
373 of the three defense-related enzymes in the cotton were increased to varying degrees. In  
374 Jimian 11, the PAL activity reached the maximum at 10 d, while the resistant variety  
375 reached the maximum at 8 d. The PAL activity in the resistant variety had a more obvious  
376 response than the susceptible variety. The POD activity of susceptible varieties increased  
377 significantly at 10 d, while the POD activity of resistant varieties peaked at 2 d, then

378 decreased to the control level after 6 d of inoculation, and peaked again after 10 d of  
379 inoculation. The PAL activity of the susceptible varieties increased at 2 d, and there was no  
380 significant difference from the control afterwards. The resistant varieties were higher than  
381 the control at 4 d, and the PPO activity peaked at 10 d (Supplemental Figure S3). Therefore,  
382 FLiC can induce different degrees of changes in the activities of three enzymes in cotton to  
383 enhance disease resistance and more obvious disease-resistant varieties.

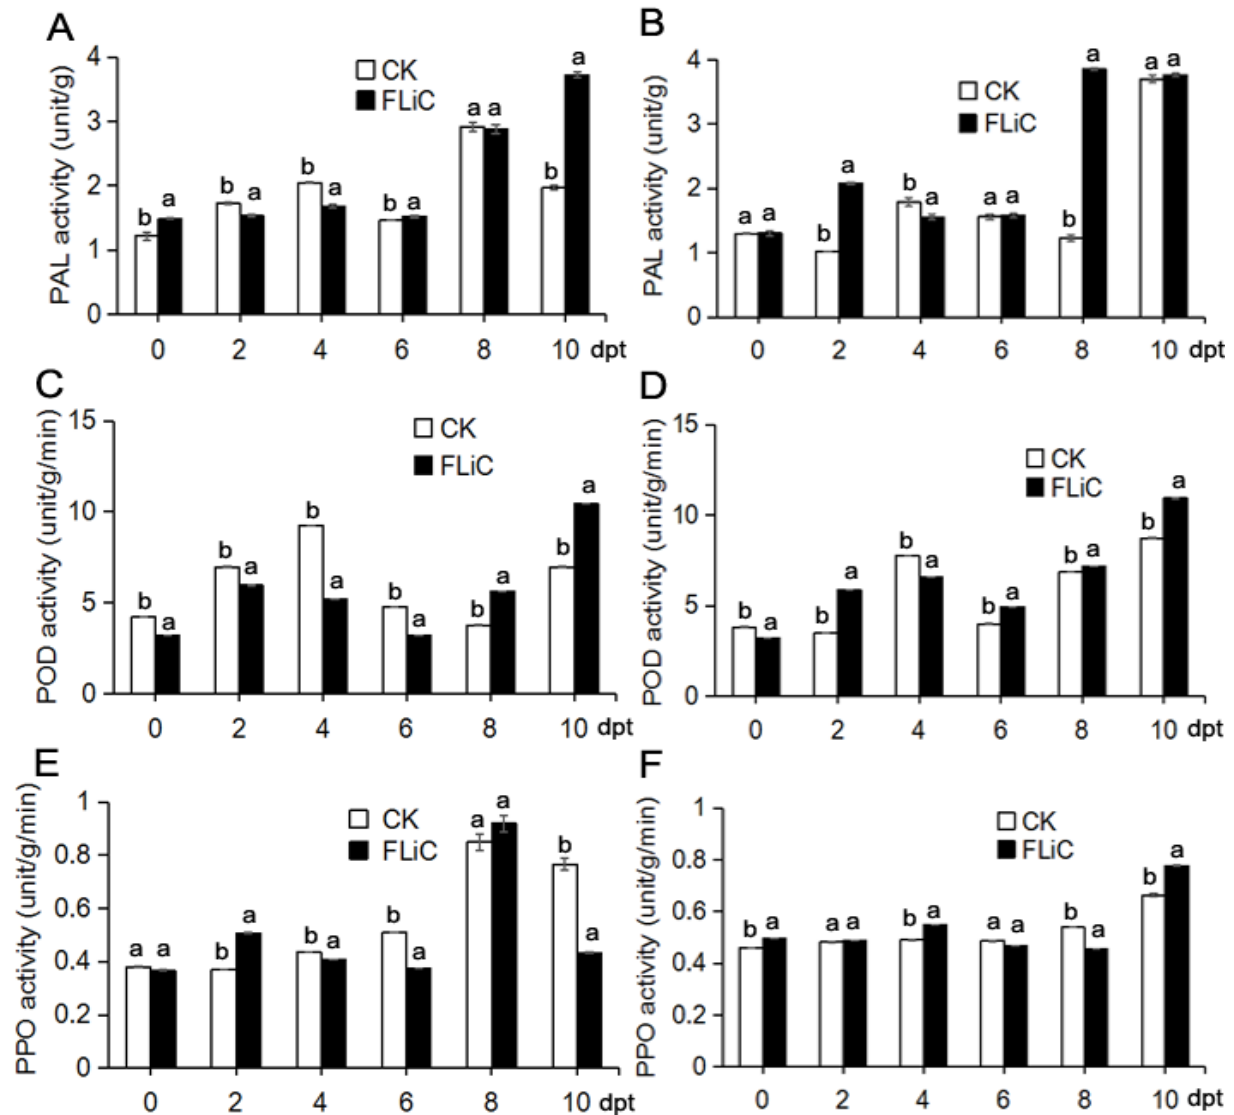

384 Supplemental Figure S3 FLiC induces the activity detection of defense-related enzymes in cotton  
385 Jimian 11 (A, C, E) and Zhongzhimian 2 (B, D, F); different letters indicate significant at the 0.05 level.  
386

387

### 388 FLiC induces the deposition of callose and lignin

389 After applying FLiC to the leaves for 2 days, there were obvious callose deposits in



390 the leaves and the lignin content increased in the stems of Zhongzhimian 2 (Figure 3A).  
391 This result is consistent with the result that FLiC induces callose deposits in resistant and  
392 susceptible cotton. After pretreatment of FLiC before inoculation with VD, the deposition  
393 of callus and lignin is more obvious. When 2-DDG and AOPP were pretreated, the amount  
394 of callose and lignin deposition decreased, the amount of spores in the roots increased  
395 significantly, and the FLiC induced resistance was weakened (Figure 3, C and D).  
396 Therefore, FLiC can induce the deposition of lignin in stem cells and callose of leaves to  
397 resist the infection of VD.

398

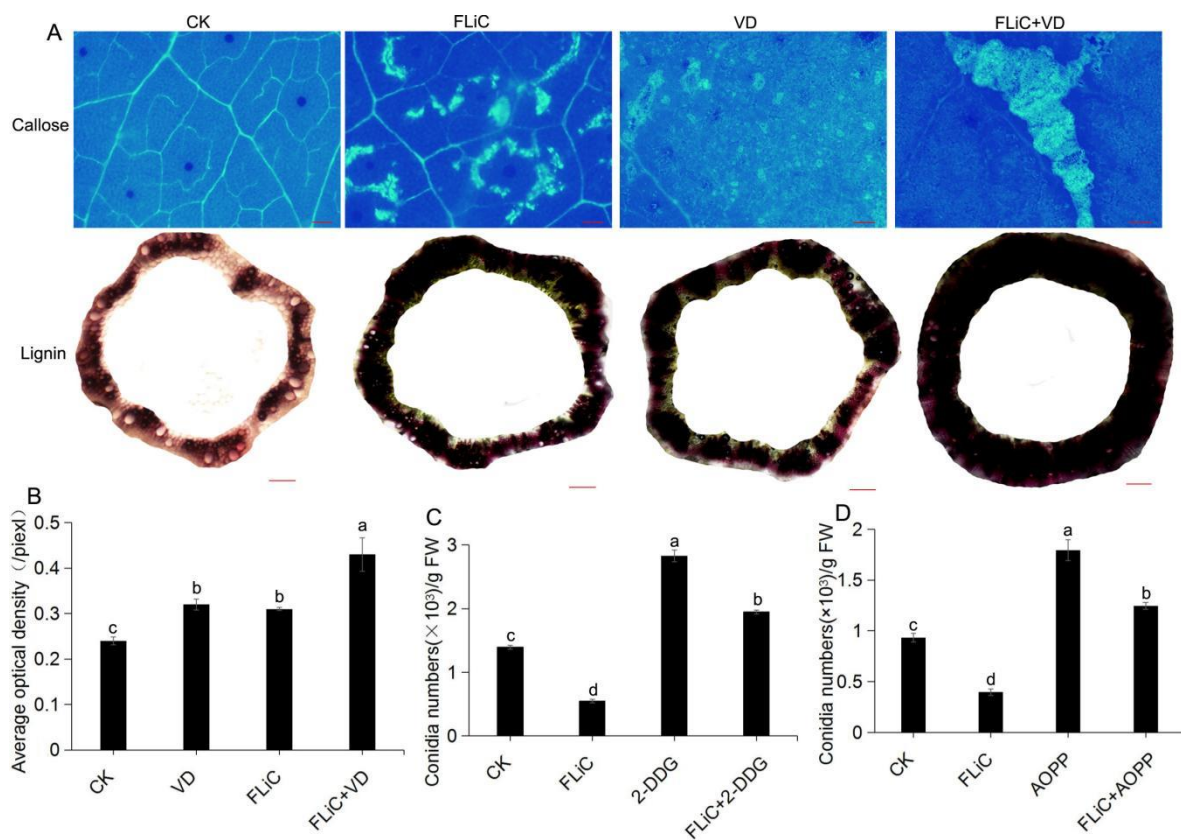

399 Figure 3 FLiC induces the deposition of lignin in cotton leaves and stems;(A) callose scale = 1000  $\mu\text{m}$ ;  
400 lignin scale = 2000  $\mu\text{m}$ ; (B), The statistics of the average optical density of callose; (C), the statistics of  
401 the bacterial mass after the corpus callose is cleared with 2-DDG; (D), the statistics of the bacterial mass  
402 after the corpus lignin is cleared with AOPP; Different letters indicate significant at the 0.05 level.

404

405

406 **FLiC-induced resistance depends on changes in defensive enzyme activity**

407 In order to further verify that FLiC can induce changes in enzyme activity in cotton to  
408 enhance the defense response. We determined the changes in the activities of six enzymes  
409 in the body of the disease-resistant variety Zhongzhimian 2 treated with FLiC alone. After  
410 FLiC smeared the leaves, the activity of defense-related enzymes changed to varying  
411 degrees (Supplemental Figure S4). CAT was significantly higher than the control on the  
412 10th day. PPO, POD, and PAL all increased significantly on the 4th day compared with the  
413 control, and on the 8th day after that they were comparable to the control, and on the 10th  
414 day they all reached a significant level compared with the control. This result is basically  
415 consistent with the changes in the activities of defense enzymes induced by FLiC in  
416 resistant and susceptible cotton varieties. CHI reached a significant level compared with the  
417 control on the 2nd and 4th day, and then began to drop to the control level. GLU increased  
418 significantly on 2nd day compared with the control, and then began to decrease. This result  
419 shows that after FLiC treatment, the activity of defense-related enzymes changes  
420 differently under different induction time to improve disease resistance.

421

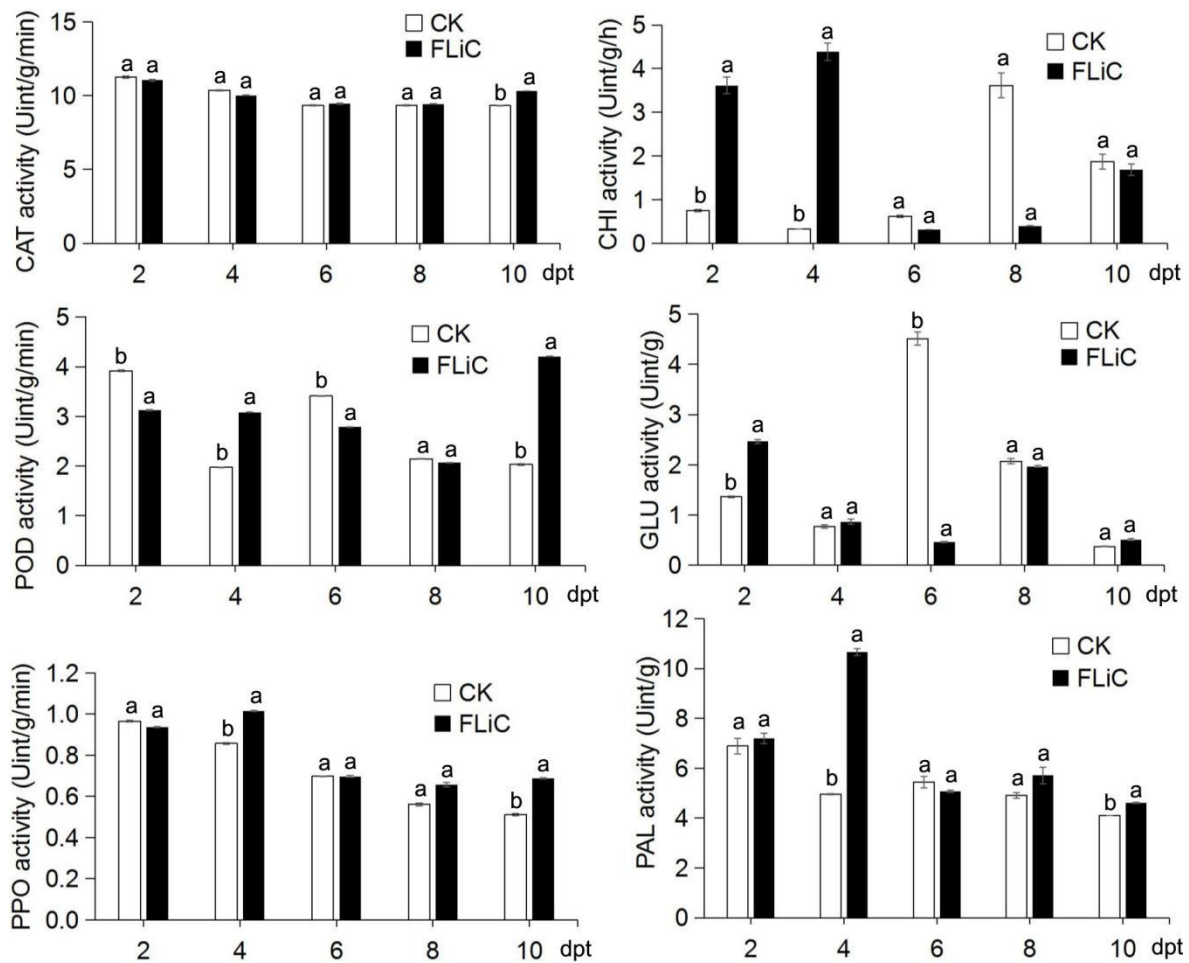

422

423

424 Supplemental Figure S4 FLiC induces changes in defense-related enzyme activities, the same letter  
425 indicates that there is no significant difference at the 0.05 level.

## 426 **FLiC induces the expression of disease resistance-related genes**

427 After the cotton seedlings were smeared with flagellin FLiC for 24 h, defense genes  
428 such as *PR1*, *CHI*, *GLU*, *POD4*, *ERF5*, *PR10*, *LOX* and *CDN1* were induced to varying  
429 degrees (Supplemental Figure S5). FLiC pretreated before inoculation with VD was the  
430 treatment group, and only VD was inoculated as the control group. After 6 hours of  
431 inoculation, the expression levels of *MAPK2*, *MAPK6* and *MAPK7* genes in the seedling  
432 roots of the treatment group were lower than those of the control, and the expression levels  
433 of the *MAPK16* gene were higher than those of the control. After 12 h and 24 h of  
434 inoculation, the expression levels of *MAPK2*, *MAPK6*, *MAPK7* and *MAPK16* genes were  
435 not significantly different from those of the control. It indicates that *MAPK16* gene may be



436 involved in the early immune response induced by FLiC. After 6 hours of inoculation with  
 437 VD, the expression levels of *WRKY5* and *WRKY6* genes were higher than the control  
 438 except for *WRKY2*, *WRKY3* and *WRKY4*. At 12 h and 24 h after inoculation, *WRKY2*,  
 439 *WRKY3*, *WRKY4*, *WRKY5* and *WRKY6* were not significantly different from the control.  
 440 These two transcription factors, *WRKY5* and *WRKY6*, may be involved in the early immune  
 441 response induced by FLiC. This is consistent with the up-regulated expression of the  
 442 differentially expressed transcription factor WRKY in the transcriptome results  
 443 (Supplemental Figure S5).

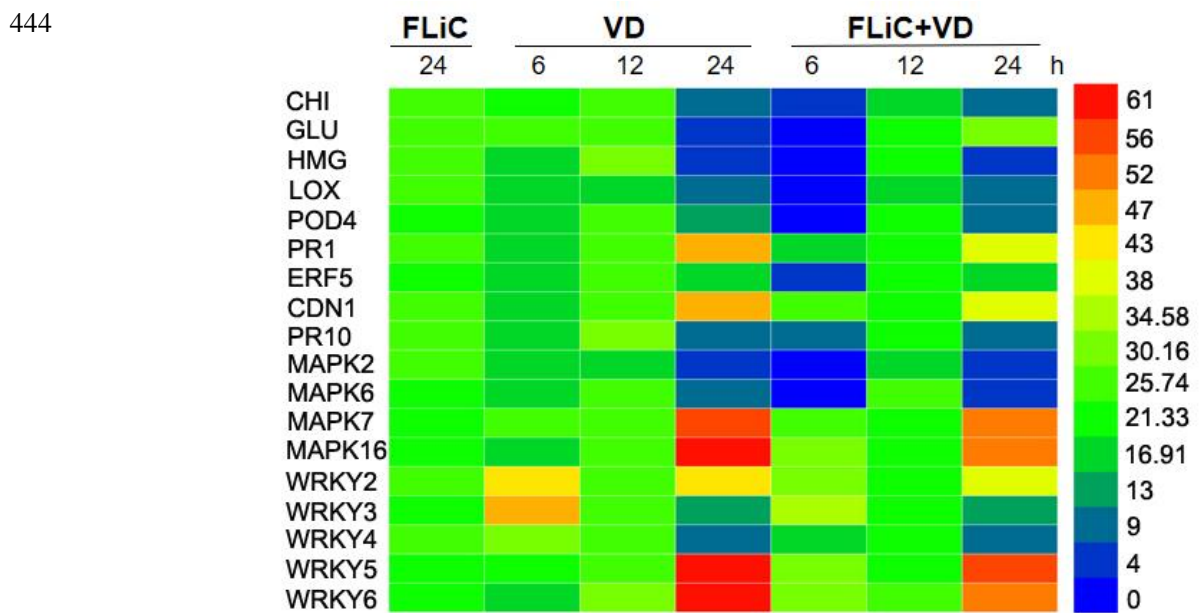

445  
 446 Supplemental Figure S5 Flagellin FLiC induced defence related genes expression  
 447

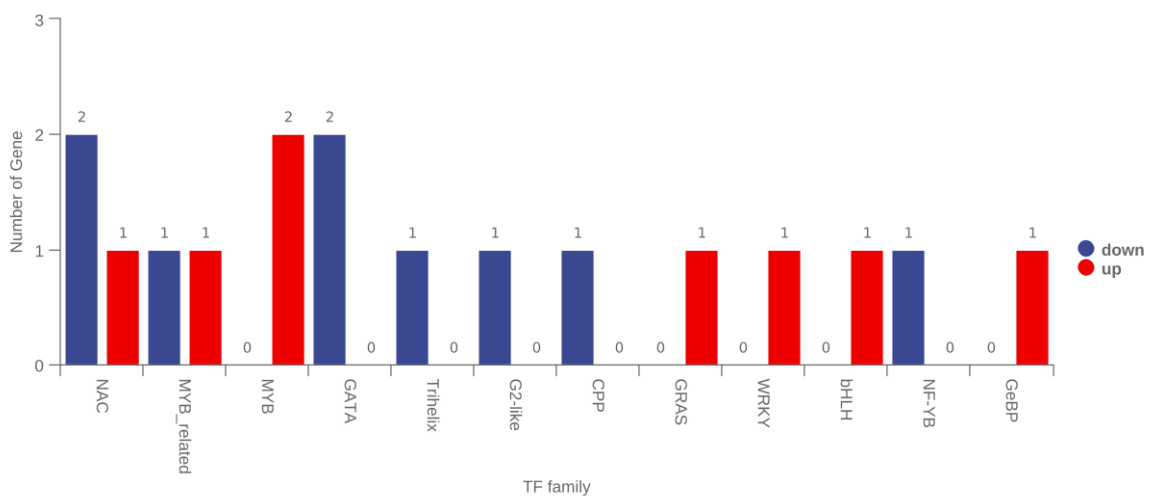

448

449 Supplemental Figure S6 Distribution of differentially expressed transcription factors in the  
450 transcriptome

451 **Metabolic pathway enriched by differentially expressed genes in the**  
452 **transcriptome**

453 The transcriptome results showed that 87 genes were up-regulated and 90 genes were  
454 down-regulated. The significantly enriched differential genes were classified and clustered  
455 as follows (Figure 4, A and B). Differentially expressed genes were significantly enriched  
456 in related disease-resistant metabolic pathways such as potassium ion, calcium antiporter  
457 activity, diterpenoid biosynthesis and phenylpropane biosynthesis (Figure 4, C-F).  
458 Significantly enriched to two down-regulated calcium antiporter activity regulatory genes,  
459 namely GH-A08G0063 and GH-D08G0067. Therefore, calcium antiporter activity  
460 regulatory genes may negatively regulate plant disease resistance.

461

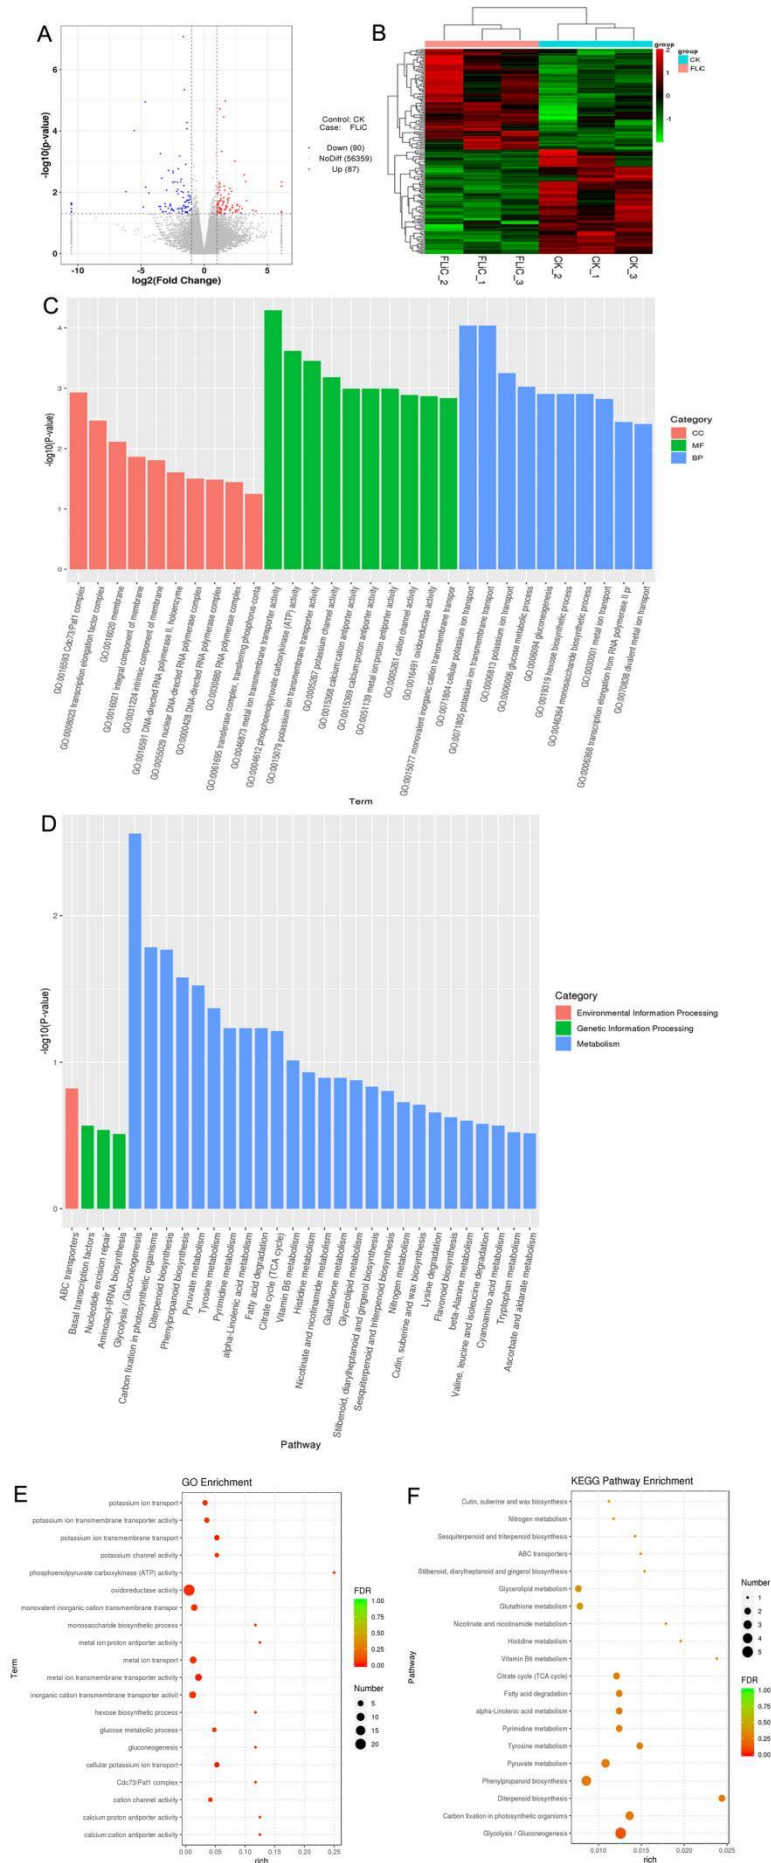

463 Figure 4 Pathways to which differentially expressed genes in the transcriptome are significantly  
464 enriched; A, differential gene volcano map; B, differential gene cluster analysis; C, GO-enriched  
465 metabolic pathway; D, KEGG-enriched metabolic pathway; E, The bubble chart of the first 20  
466 metabolic pathways enriched by GO; F, the bubble chart of the first 20 metabolic pathways enriched by  
467 KEGG. Note: C, the abscissa is the term of Go level 2, and the ordinate is the  $-\log_{10}$  (p-value) enriched  
468 for each term. D, the abscissa is the name of the pathway, and the ordinate is the  $-\log_{10}$  (p-value)  
469 enriched for each pathway.

470

## 471 RT-PCR verification of transcriptome results

472 Twelve groups were randomly selected from the RNA-seq sequencing results to verify  
473 the transcriptome results by RT-PCR. The results showed that 11 of the 12 groups had the  
474 same expression trend as the transcriptome, with an accuracy rate of 91.67%. It shows that  
475 the transcriptome results are credible (Supplemental Figure S7).

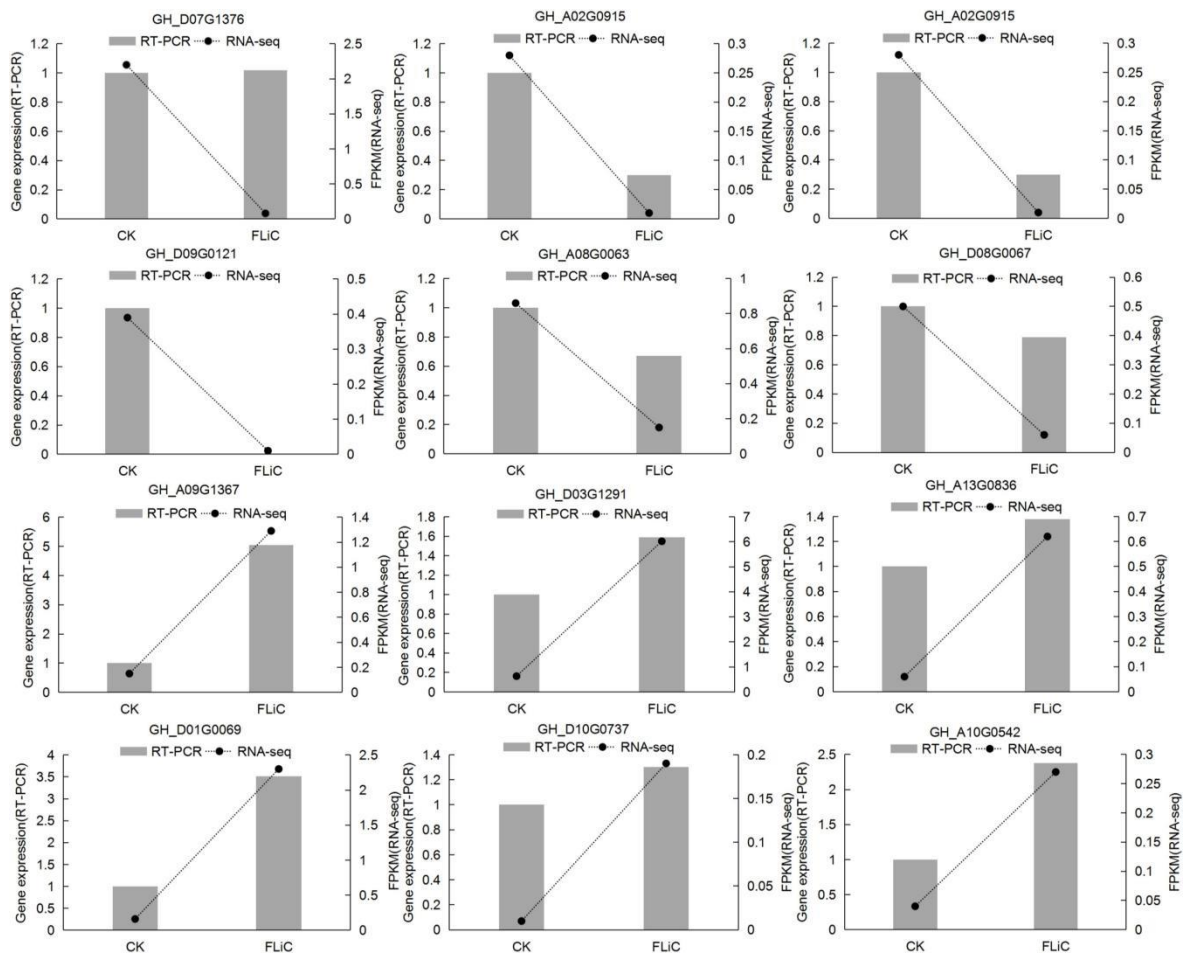

477 Supplemental Figure S7 Verification of FLiC transcriptome results

478

479 **The relationship between Ca<sup>2+</sup>, NO and H<sub>2</sub>O<sub>2</sub>**

480 **1. FLiC induces an increase in intracellular Ca<sup>2+</sup>**

481 According to the results of the transcriptome, the calcium antiporter activity was  
482 significantly enriched. In order to verify that the FLiC protein induced resistance, the  
483 increase in calcium ion influx caused the downstream immune response. The cotton  
484 epidermal cells were loaded with Ca<sup>2+</sup> sensitive fluorescent probe Fluo-3/aM, and then  
485 FLiC protein at a concentration of 100 µg/mL was processed and observed with LSCM.  
486 The results show that FLiC treatment can cause a significant increase in the fluorescence  
487 intensity of epidermal cells (Figure 5). Pretreatment of Ca<sup>2+</sup> chelating agent EGTA and Ca<sup>2+</sup>  
488 channel blocker LaCl<sub>3</sub> significantly reduced the fluorescence intensity induced by FLiC.  
489 Therefore, FLiC can induce the increase of Ca<sup>2+</sup> concentration in cotton epidermal cells.  
490 This is consistent with the results of calcium-related metabolic pathways that are  
491 significantly enriched in the transcriptome.

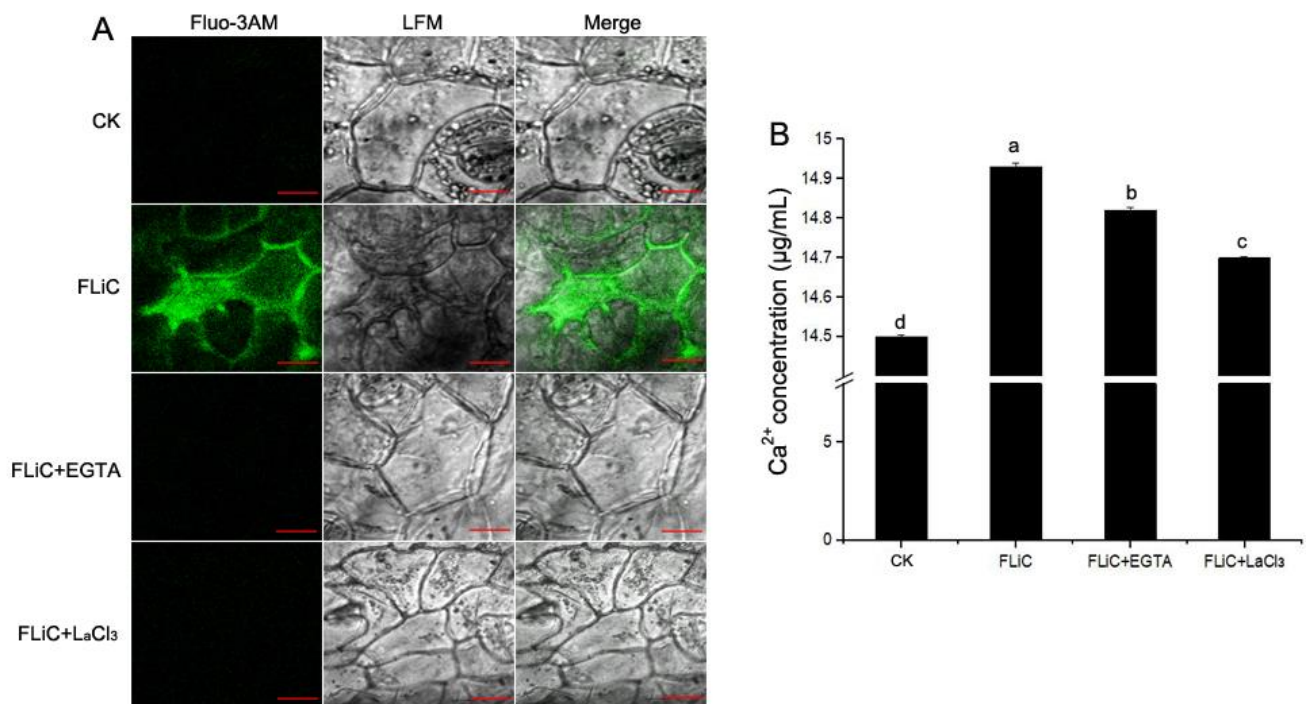

492

493 Figure 5 FLiC induces  $\text{Ca}^{2+}$  production in cotton epidermal cells; different letters indicate significant  
494 differences at the 0.05 level; bar= 50  $\mu\text{m}$

## 495 **2. Different pretreatments affect the $\text{H}_2\text{O}_2$ burst induced by FLiC**

496 To determine the relationship between ROS,  $\text{Ca}^{2+}$  and NO. Two days after the FLiC  
497 smearing treatment, there was an obvious burst of ROS in the leaves (Supplemental Figure  
498 S8A). In order to study the influence of FLiC treatment on the relationship among  $\text{Ca}^{2+}$ ,  
499 NO and  $\text{H}_2\text{O}_2$ , after pretreatment of CAT, EGTA and  $\text{LaCl}_3$ , the  $\text{H}_2\text{O}_2$  content in the leaves  
500 was significantly reduced to the control level. After pretreatment of C-PTIO, L-NAME and  
501 Tungstate, the  $\text{H}_2\text{O}_2$  content in the leaves was higher than that induced by FLiC alone  
502 (Supplemental Figure S8B). The above results indicate that  $\text{Ca}^{2+}$  are located upstream of  
503  $\text{H}_2\text{O}_2$  and affect the synthesis of  $\text{H}_2\text{O}_2$ , while NO may be located beside or downstream of  
504  $\text{H}_2\text{O}_2$ . After FLiC treatment for 5-30 days, the  $\text{H}_2\text{O}_2$  in the leaves of the seedlings continued  
505 to be significantly higher than that of the control. Until the 30th day, the  $\text{H}_2\text{O}_2$  content  
506 began to decrease, but it was still higher than the control (Supplemental Figure S8C).  
507 Therefore, FLiC protein can induce cotton to produce an immune response and last longer.



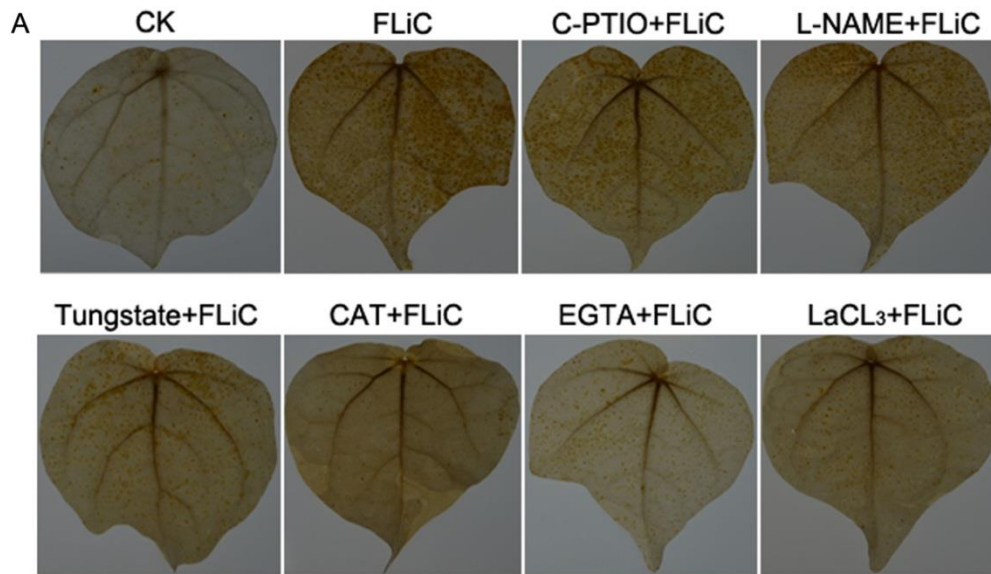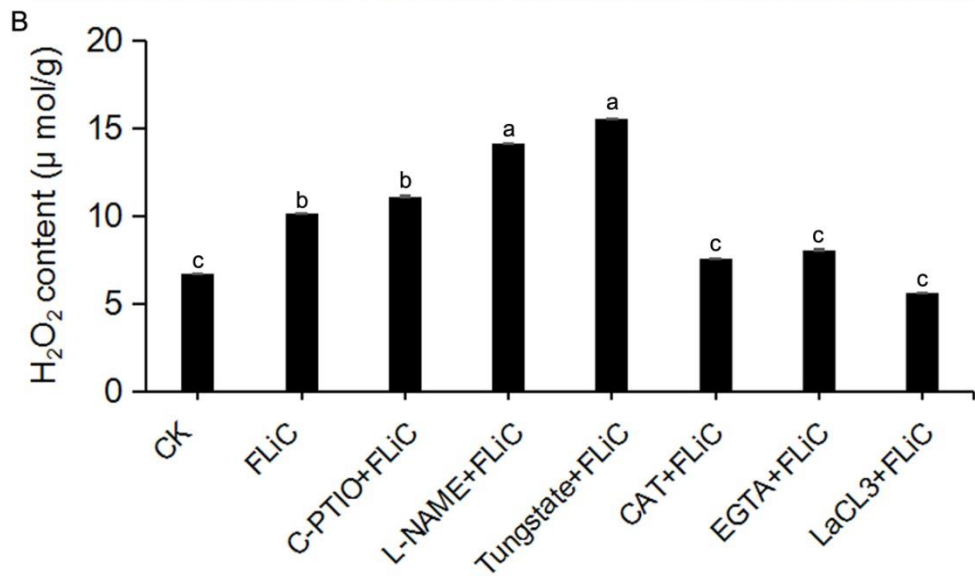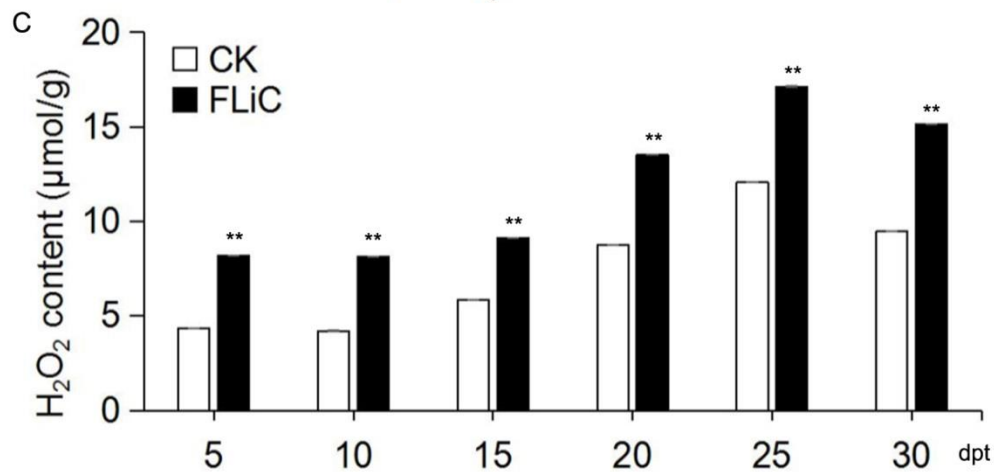

508

509

510 Supplemental Figure S8 The effect of NO scavenger C-PTIO, NO synthesis inhibitor L-NAME and

511 sodium tungstate, H<sub>2</sub>O<sub>2</sub> scavenger CAT, Ca<sup>2+</sup> chelating agent EGTA and Ca<sup>2+</sup> channel inhibitor LaCl<sub>3</sub> on

512 FLiC-induced H<sub>2</sub>O<sub>2</sub> production. The brown substance represents the H<sub>2</sub>O<sub>2</sub> in the leaves. Different letters



513 indicate significant differences at the 0.05 level.\*\*, means that the difference is extremely significant at  
514 the 0.01 level.

515

### 516 **3. FLiC induces NO production in cotton cells**

517 There was strong fluorescence around the epidermal cells and stomata of cotton  
518 treated with FLiC, indicating that FLiC can induce the production of NO by cotton  
519 epidermal cells (Figure 6A). When the concentration of FLiC was 400  $\mu\text{g}/\text{mL}$  and the  
520 treatment for 1 h, the fluorescence intensity was the strongest (Figure 6B), indicating that  
521 the production of NO induced by FLiC depends on the concentration of FLiC and the  
522 treatment time. After pretreatment of NO scavenger C-PTIO and NOS pathway inhibitor  
523 L-NAME, the fluorescence intensity decreased significantly (Figure 6A), indicating that  
524 C-PTIO and L-NAME have an inhibitory effect on FLiC-induced NO production in  
525 cotton epidermal cells. Nitrate reductase(NR) pathway inhibitor tungstate has only a  
526 small inhibitory effect on FLiC-induced NO production in cotton epidermal cells. It  
527 indicates that FLiC induces the production of NO by cotton epidermal cells, which may  
528 be mainly synthesized through the nitric oxide synthase (NOS) pathway. After  
529 pretreatment with CAT, EGTA and  $\text{LaCl}_3$ , the NO content was significantly reduced. It  
530 shows that  $\text{Ca}^{2+}$  and  $\text{H}_2\text{O}_2$  are involved in the production of NO. Preliminary experiments  
531 have shown that pretreatment of C-PTIO and L-NAME, FLiC can still induce more  $\text{H}_2\text{O}_2$   
532 production. It shows that NO has an inhibitory effect on FLiC-induced  $\text{H}_2\text{O}_2$ . After  
533 pretreatment of EGTA and  $\text{LaCl}_3$ , the content of  $\text{H}_2\text{O}_2$  is significantly reduced (Figure S8,  
534 A and B). Therefore, in the immune response induced by FLiC,  $\text{Ca}^{2+}$  located upstream of  
535  $\text{H}_2\text{O}_2$  and participate in the production of  $\text{H}_2\text{O}_2$ .  $\text{H}_2\text{O}_2$  will stimulate the production of  
536 NO, and excessive NO will inhibit the production of  $\text{H}_2\text{O}_2$ .

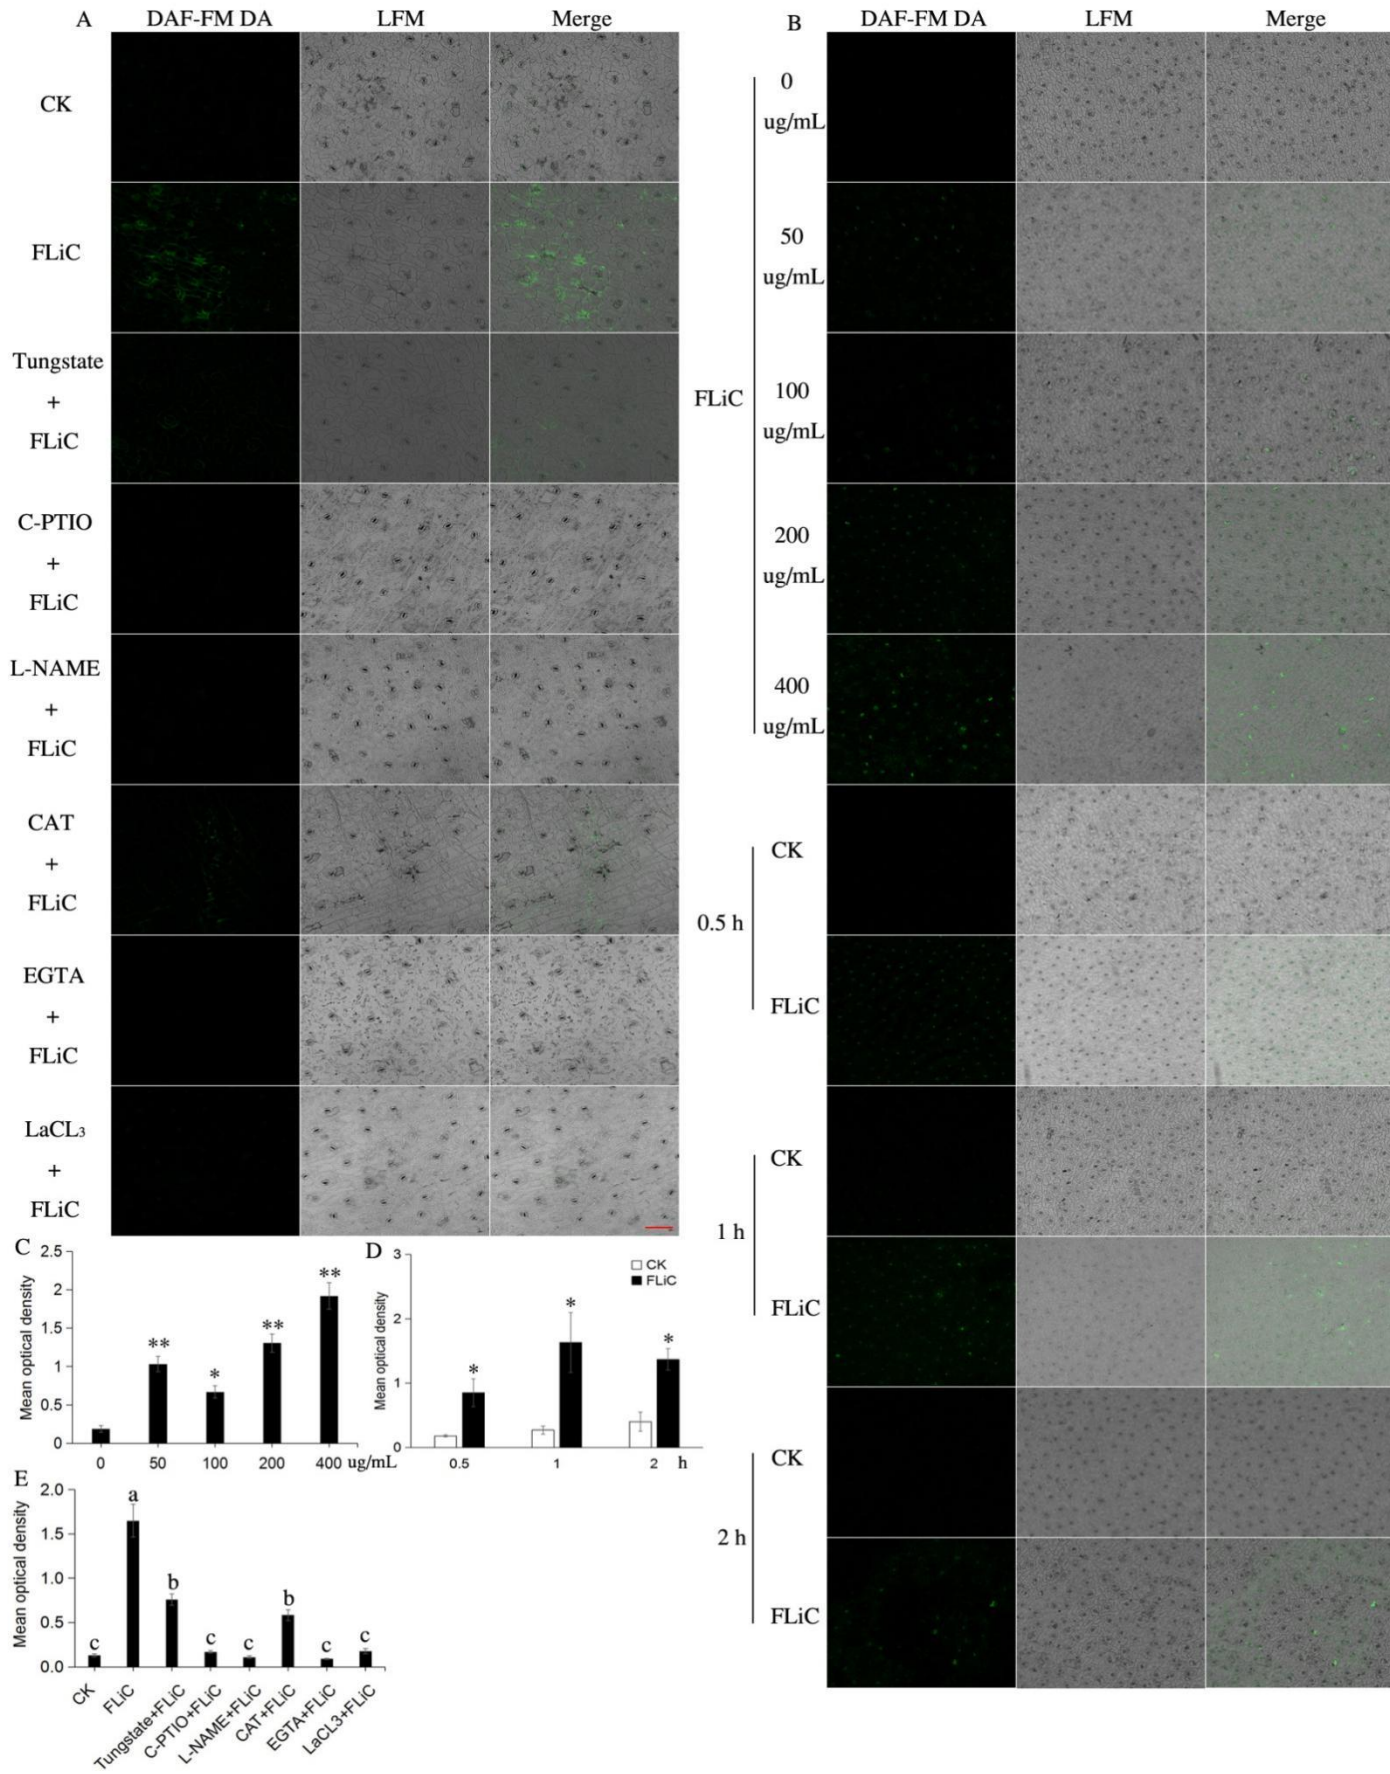

537

538

Figure 6 NO production in response to FLiC treatment in cotton leaves

539 A. Fluorescence in cotton epidermal cells during different pretreatments (200  $\mu$ M C-PTIO, 200  $\mu$ M  
540 L-NAME, 100  $\mu$ M tungstate, 100 unit/mL CAT, 5 mM EGTA and 200  $\mu$ M LaCl<sub>3</sub>); B. Fluorescence  
541 produced in cotton epidermal cells with different protein concentration and different treatment time; C.  
542 The average fluorescence density of NO in cotton epidermal cells treated with different protein  
543 concentrations; D. The average fluorescence density of NO in cotton epidermal cells after different  
544 treatment time; E. The average fluorescence density of NO in cotton epidermal cells after different  
545 pretreatments; \*: The difference is significant at the 0.05 level; \*\*: the difference is extremely significant  
546 at the 0.01 level; different letters indicate that the difference between the treatments is significant at the  
547 0.05 level; Bars = 20  $\mu$ m.

548

## 549 **NO is involved in FLiC-induced resistance**

### 550 **1. NO is involved in the deposition of callose induced by FLiC**

551 FLiC protein can induce callose in cotton leaves (Supplemental Figure S9), and after  
552 pre-treatment of C-PTIO and L-NAME, FLiC-induced callose is significantly reduced  
553 (Supplemental Figure S9). Therefore, the increase of callose induced by FLiC is dependent  
554 on NO.

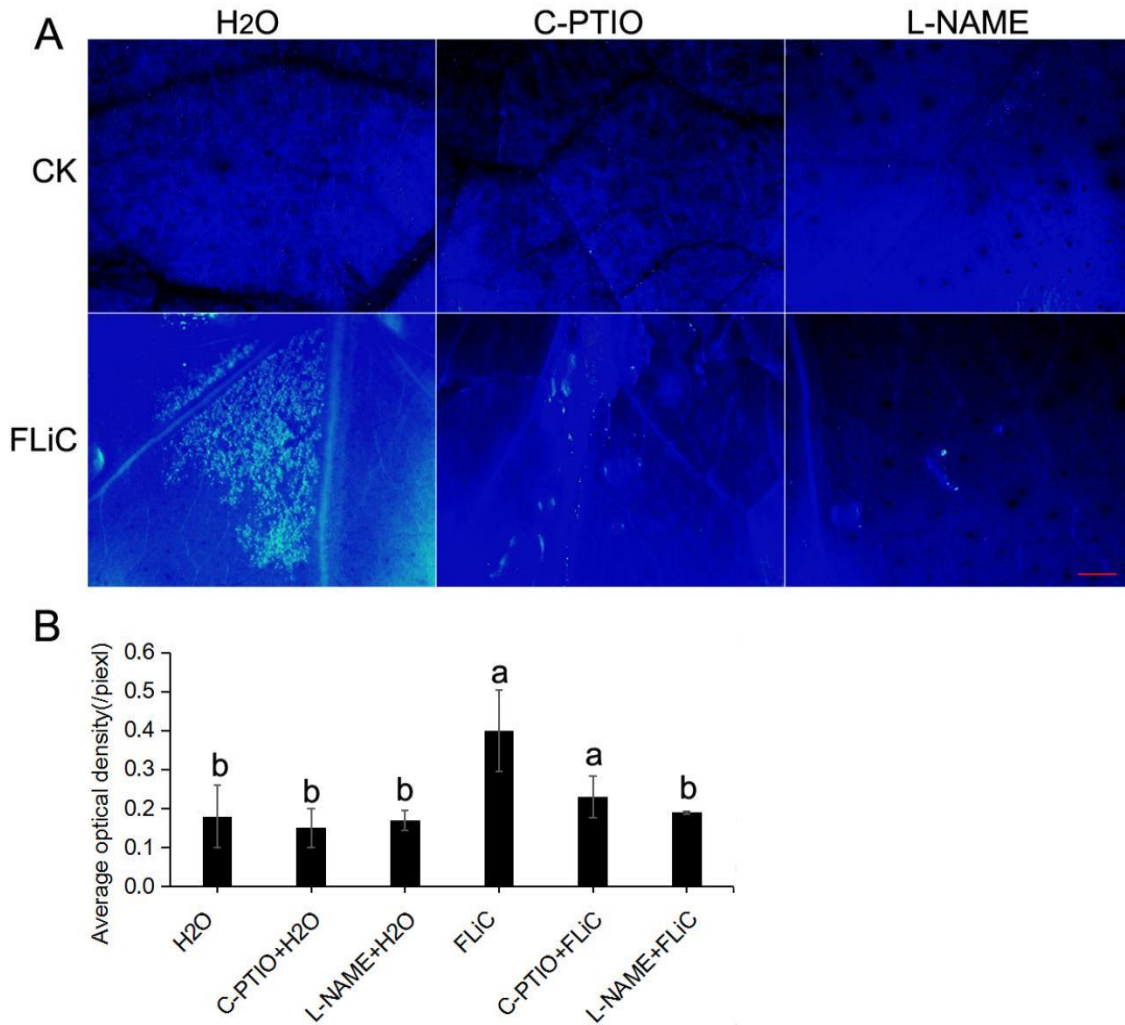

555

556

557 Supplemental Figure S9 NO is involved in the deposition of callose induced by FLiC; different letters  
558 indicate significant at the 0.05 level; bars=500  $\mu$ m

## 559 2. NO reduces the damage of VD

560 After 48 hours of inoculation with VD, the number of pathogens colonizing the roots  
561 of cotton seedlings pretreated with FLiC was significantly less than that of the control  
562 (Supplemental Figure S10A). After pretreatment of C-PTIO, the number of pathogen  
563 colonization increased, and the difference reached a significant level compared with the  
564 control (Supplemental Figure S10D). Five days after the leaf was inoculated with spores of  
565 VD, lesions were observed on the leaf surface (Supplemental Figure S10B). The disease  
566 degree of the leaves of the seedlings treated with FLiC was significantly less than that of



567 the control. The area of leaf damage of pretreatment with C-PTIO, FLiC treatment and  
568 control seedlings all increased. This result further indicates that the NO induced by FLiC  
569 participates in the resistance of cotton to VD.

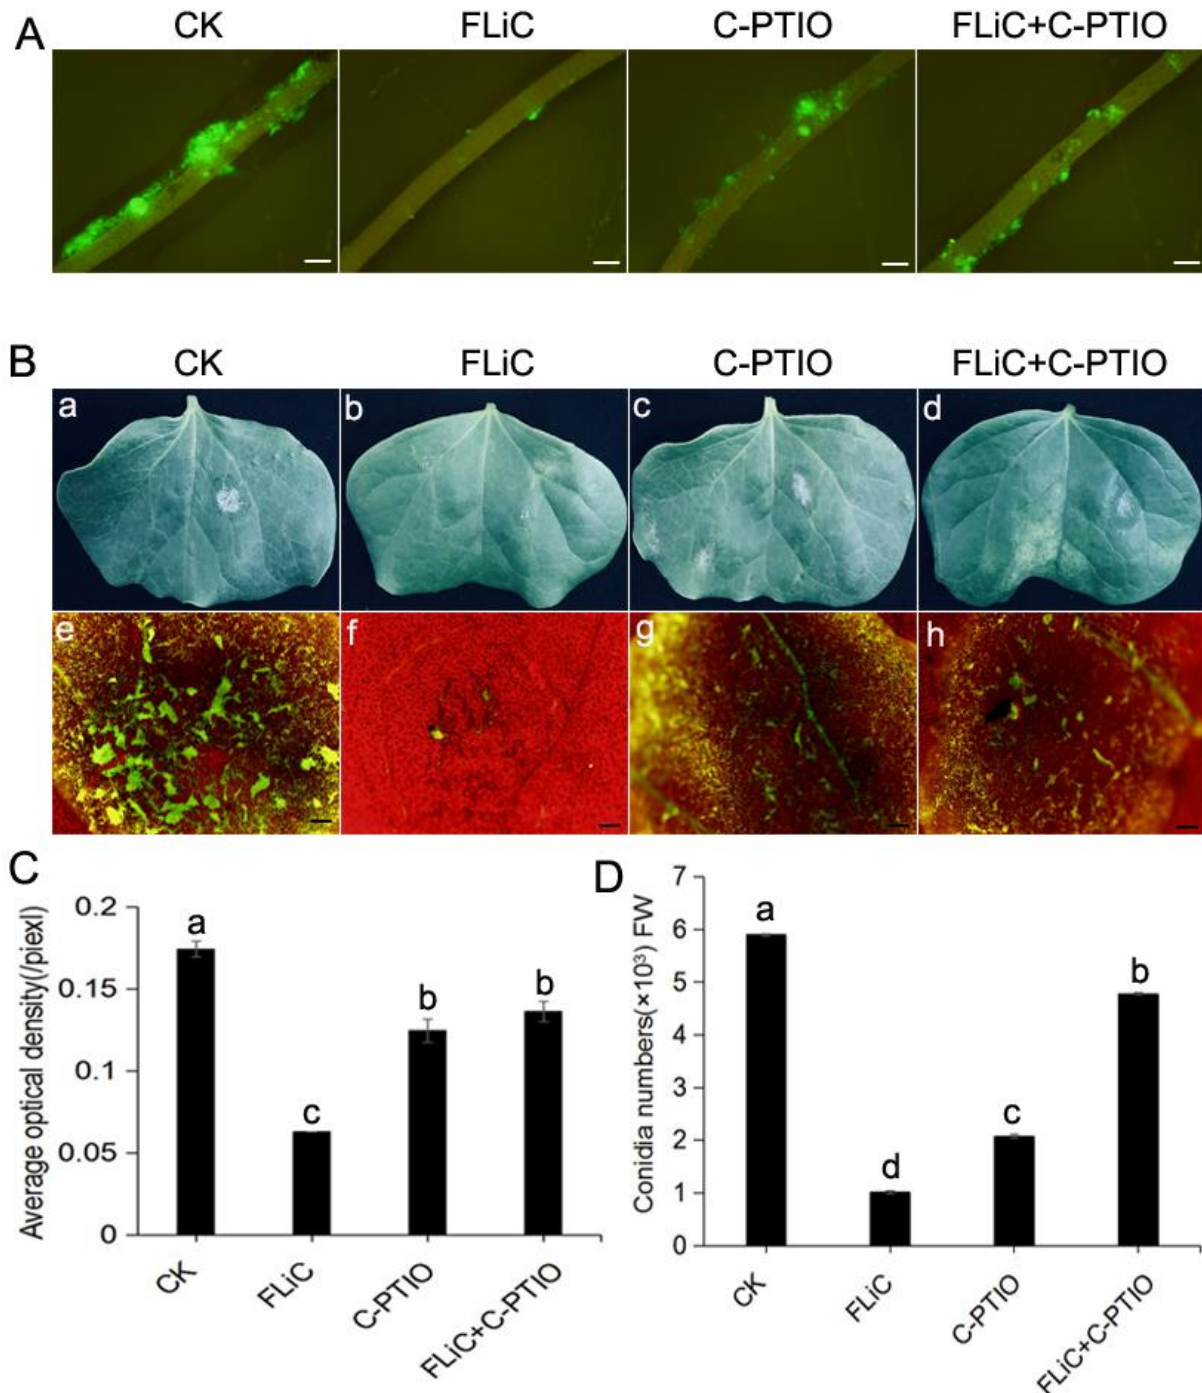

570  
571 Supplemental Figure S10 NO is involved in FLiC-induced disease resistance  
572 A. Colonization of fluorescently labeled VD on cotton roots. B. The infection of leaves inoculated  
573 with VD under different treatments. a, b, c and d: leaf parts inoculated with VD. e, f, g and h:  
574 observe the infection of VD on cotton cotyledons under a fluorescence microscope. C. The average

575 fluorescence density value of cotton roots. D. The number of spores on cotton roots. Different letters  
576 indicate significant differences at the 0.05 level. Bars=500  $\mu\text{m}$ .

577

578 **Calcium antiporter activity (GhCAA) increases in anti-disease**  
579 **substances after silence**

580 In order to verify that the calcium antiporter activity regulatory gene negatively  
581 regulates the disease resistance of cotton. After the positive control true leaves appeared  
582 albino, the silencing efficiency of GhCAA was determined to reach 62% (Figure 7, A and  
583 B). After the *GhCAA* gene was silenced, the intracellular  $\text{Ca}^{2+}$  and NO content in the  
584 epidermis of cotton leaves after applying FLiC were significantly higher than that of WT  
585 and TRV2::00 (Figure 7, C-G); The accumulation of ROS, callose and lignin was  
586 significantly higher than that of WT and TRV2::00 (Figure 7E). Therefore, FLiC negatively  
587 regulates the disease resistance of cotton by inhibiting the expression of *GhCAA* gene.

588

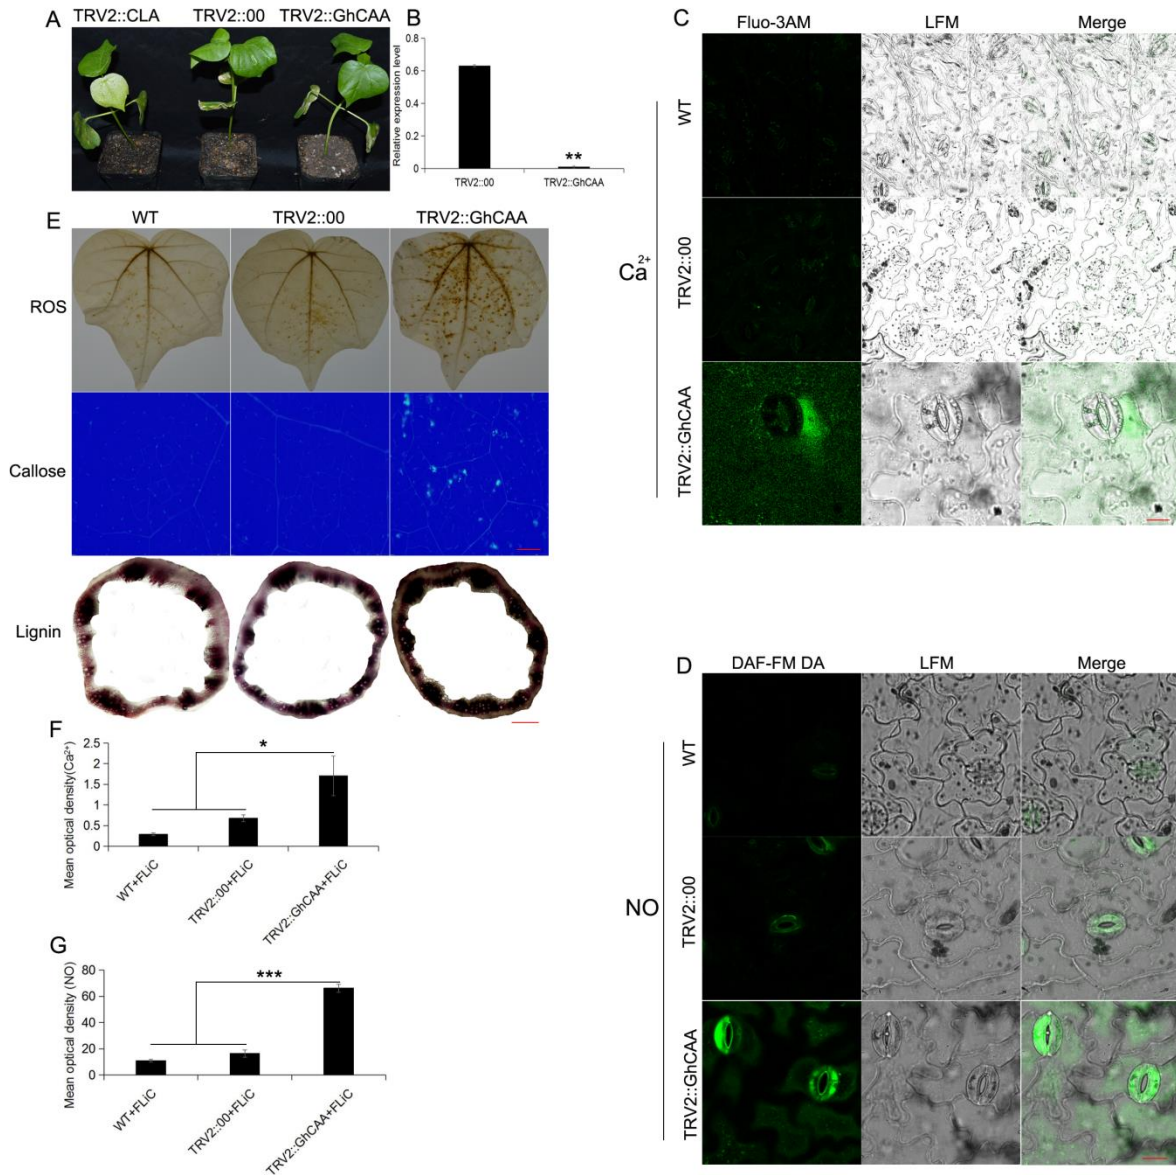

589  
 590 Figure 7 Anti-disease substances increase after the silencing of the calcium antiporter activity gene  
 591 *GhCAA*; \*: The difference is significant at the 0.05 level; \*\*\*: the difference is extremely significant at  
 592 the 0.001 level; C and D, bars= 50  $\mu$ m; E, bars= 2000  $\mu$ m.

593  
 594 **Transgenic Arabidopsis with *FLiC* gene enhances resistance to VD and**  
 595 **increases the expression of disease-resistant genes**

596 The *FLiC* gene-transformed Arabidopsis has enhanced disease resistance to VD  
 597 (Supplemental Figure S11A). The expression of *FLiC* gene increased significantly at 24 h  
 598 after inoculation (Supplemental Figure S11B). Therefore, transgenic *FLiC* gene



599 Arabidopsis can be highly expressed in vivo to improve plant disease resistance to VD. In  
600 order to verify that *FLiC* gene-transformed Arabidopsis has enhanced resistance to VD, we  
601 tested lipoxygenase (*LOX*), phenylalanine ammonia lyase (*PAL*), disease-related protein  
602 (*PR1*) and vegetative storage protein (*VSP*). The expression of the four disease resistance  
603 genes increased significantly. Therefore, *FLiC* gene-transformed Arabidopsis can  
604 effectively increase the expression of disease resistance genes related to the SA and JA  
605 signal pathways and enhance the plant's disease resistance. The expression level of  
606 glutathione peroxidase gene (*GPX7*) showed no increasing trend or even lower than the  
607 control; peroxidase (*POD*) was expressed more obviously when exposed to VD than the  
608 control; glutathione sulfur transferase gene (*GSTU3*) expression increased significantly  
609 (Supplemental Figure S11). Therefore, *FLiC* gene-transformed Arabidopsis can effectively  
610 regulate the up-regulated expression of ROS and NO signal-related genes in plant roots and  
611 enhance disease resistance.

612

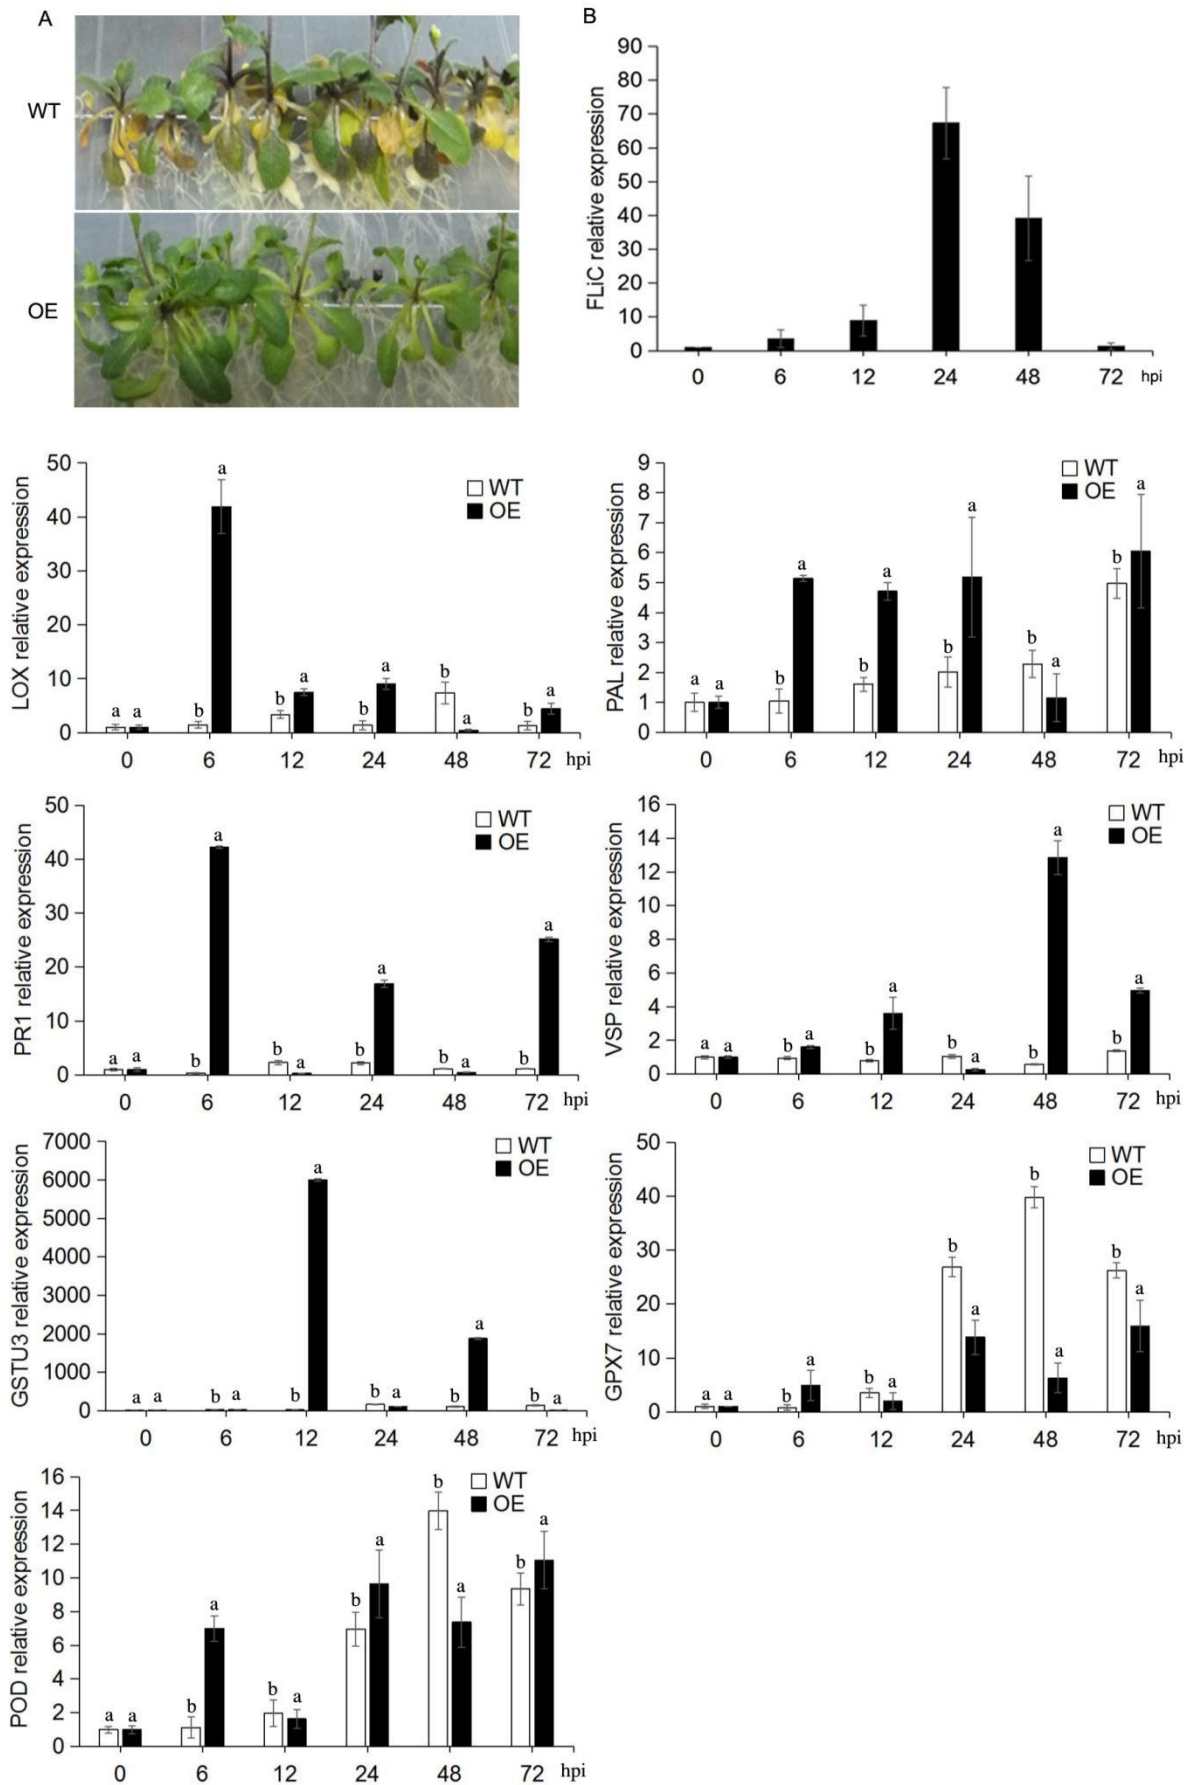

613

614

615 Supplemental Figure S11 A, *FLiC* gene-transformed *Arabidopsis* has enhanced disease resistance. B,  
616 *FLiC* expression in transgenic *Arabidopsis thaliana* increased after inoculation; WT: wild type; OE: over  
617 expression; *PAL*: phenylalanine ammonia lyase; *PRI*: disease-related protein; *LOX*: lipoxygenase; *VSP*:  
618 vegetative storage protein; *GPX7*: glutathione peroxidase; *GSTU3*: glutathione sulfur transfer Enzyme  
619 gene; *POD*: peroxidase; Different letters indicate significant differences at the 0.05 level.

620  
621

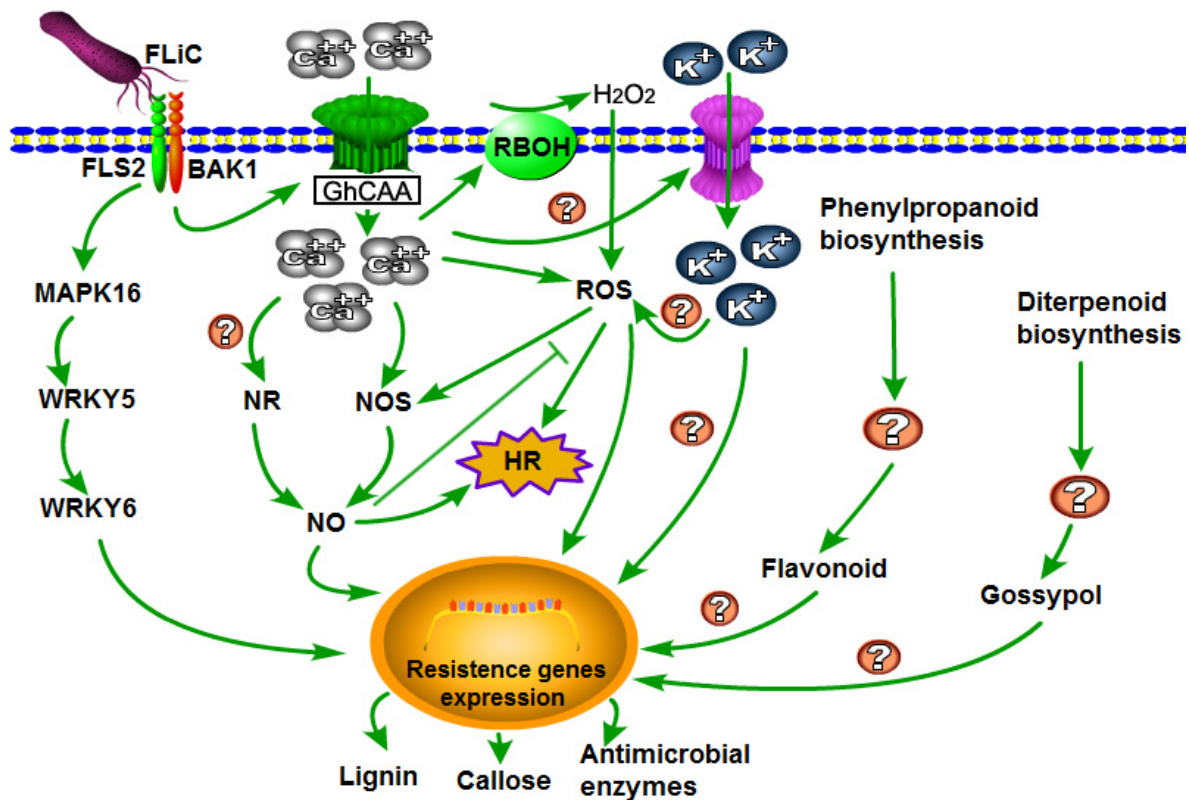

622

623 Figure 8 Reasoning of FLiC-induced resistance signal pathway

624

625

626

627

628 **Discussion:**

629 **The metabolic pathways of FLiC protein and Flg22 protein to induce**  
630 **immune response are different**

631 Rice is not sensitive to Flg22 but can recognize full-length flagellin (Takai, et al.,  
632 2007). However, the mechanism by which full-length flagellin regulates the immune  
633 response of plants is unclear. The effect and mechanism of FLiC full-length protein on  
634 plant immune response have not been reported yet. Flg22 can induce immune response  
635 effects in different plants, but there is no systematic metabolic pathway study in upland  
636 cotton. We cloned a new type of flagellin gene *FLiC*, which contains the amino acid  
637 sequence of Flg22. It can induce cotton to produce an immune response, such as the *MAPK*  
638 cascade reaction and the up-regulation of key genes in disease resistance pathways such as  
639 SA, JA, and ETH (Supplemental Figure S5). After the protein is treated with cotton, the  
640 differentially expressed genes can be significantly enriched in potassium ions, calcium ions,  
641 diterpenoid synthesis, phenylpropane biosynthesis, lignin biosynthesis, nitrogen  
642 metabolism and other disease-resistant metabolic pathways through transcriptome analysis.  
643 Therefore, the disease resistance induced by FLiC protein in cotton is related to the  
644 activation of these pathways. We found that after silencing *GhCAA* on the membrane, the  
645 intracellular  $\text{Ca}^{2+}$  content increased and induced NO,  $\text{H}_2\text{O}_2$  and disease resistance related  
646 substances to increase. It is clear that  $\text{Ca}^{2+}$ , NO and  $\text{H}_2\text{O}_2$  are coordinately regulated to  
647 enhance the resistance of cotton to VD (Figure 8). A 32 kDa flagellin Flg22 extracted from  
648 *Pseudomonas syringae* can be used as an elicitor to induce defense responses in tomato  
649 cells (Felix et al., 1999). Flg22 can induce a strong defense response in Arabidopsis,  
650 including ROS bursts, callose deposition, ethylene production and the expression of  
651 defense-related genes (Gómez-Gómez et al., 2000). Peroxidase-dependent oxidation burst  
652 plays an important role in the basic resistance of *Arabidopsis thaliana* mediated by Flg22  
653 recognition (Daudi et al., 2012; Liu et al., 2015). Nonexpresser of PR genes (*NPRI*) play a  
654 role in the SA-induced initiation event, which enhances the oxidative burst triggered by  
655 Flg22. This is related to the enhancement of callose deposition induced by Flg22 (Yi and

656 Kwon, 2014). Treatment of non-host plant tobacco with Flg22 will cause a strong defense  
657 response, indicating that Flg22 is a PAMP that can act on a variety of plants and has a broad  
658 spectrum of resistance (Nicaise, 2009). Therefore, our research not only found a new  
659 full-length flagellin gene, but also used upland cotton as research material to explore a new  
660 way to induce an immune response in plants and provide a new protein for cotton to resist  
661 VD.

662

### 663 **Ca<sup>2+</sup>, NO and H<sub>2</sub>O<sub>2</sub> synergistically enhance cotton disease resistance**

664

665 The relationship among Ca<sup>2+</sup>, NO and H<sub>2</sub>O<sub>2</sub> in plants to regulate plant disease  
666 resistance is still unclear. The interaction between the two to regulate the immune response  
667 has been reported. NO not only participates in the regulation of plant growth and  
668 development, but also participates in the signal transmission of plants in response to  
669 various biotic and abiotic stresses (Yan et al., 2007; Sang et al., 2008; Martínez-Medina et  
670 al., 2019). Ca<sup>2+</sup> can activate the NO signal, and can also sense the NO signal. Ca<sup>2+</sup>  
671 participates in the production of NO in tobacco and grapes induced by the elicitor, and the  
672 NO produced can in turn cause the increase of intracellular Ca<sup>2+</sup> concentration (Lamotte et  
673 al., 2004; Vandelle et al., 2006; Besson-Bard et al., 2008). These indicate that there is an  
674 interaction between Ca<sup>2+</sup> and NO signals. it was found that an increase in  
675 Ca<sup>2+</sup> concentrations in mesophyll cells was necessary for the cells to produce ROS after  
676 pathogen infection(Qiao et al., 2015). The synergistic effect of NO and H<sub>2</sub>O<sub>2</sub> triggers the  
677 death of hypersensitive cells. The absence of any one of this system cannot induce cell  
678 death (Tada et al., 2004). Transient changes in the content of NO and H<sub>2</sub>O<sub>2</sub> can activate a  
679 series of physiological responses in plants, and they can interact to regulate the same or  
680 related signal pathways to enhance a certain response. H<sub>2</sub>O<sub>2</sub> can induce the synthesis and  
681 accumulation of NO, and H<sub>2</sub>O<sub>2</sub> regulates the NO content by affecting the activity of NO  
682 synthase (Zhang et al., 2007). Similarly, NO can regulate H<sub>2</sub>O<sub>2</sub> levels. H<sub>2</sub>O<sub>2</sub> is involved in  
683 mediating NO-induced resistance of tomato to *Rhizopus Nigricans*(Fan et al., 2008).  
684 Ca<sup>2+</sup> and H<sub>2</sub>O<sub>2</sub> are involved in upstream of NO production to induce the HR cell death  
685 (Qiao et al., 2015). However, it is not clear whether the content of NO negatively adjusts

686 the content of H<sub>2</sub>O<sub>2</sub> . This study found that FLiC binds to membrane receptors and  
687 negatively regulates calcium antiporter activity to increase the intracellular influx of Ca<sup>2+</sup>  
688 and induce the production of H<sub>2</sub>O<sub>2</sub> and NO; H<sub>2</sub>O<sub>2</sub> acts as a signal molecule to induce the  
689 production of NO, and NO inhibits the synthesis of H<sub>2</sub>O<sub>2</sub>; H<sub>2</sub>O<sub>2</sub> and NO can induce the  
690 production of defense responses. It shows that Ca<sup>2+</sup>、NO and H<sub>2</sub>O<sub>2</sub> are synergistically  
691 regulating the resistance of cotton to VD.

692

### 693 ***GhCAA* negatively regulates immune response**

694 No calcium antiporter-related regulatory genes have been found in cotton to negatively  
695 regulate calcium ion levels and participate in cotton disease resistance. Bacterial flagellin is  
696 the most in-depth study of PAMP (Wang, 2012). After Flg22 processes *Arabidopsis*  
697 *thaliana*, the Ca<sup>2+</sup> channel and its activation mechanism of stomatal closure in the process  
698 of immune signal transduction indicate the specificity of the Ca<sup>2+</sup> influx mechanism in  
699 response to different stresses (Thor et al., 2020). HopZ-Activated Resistance 1 (ZAR1)  
700 resistant body acts as a calcium permeable cation channel to trigger plant immunity and cell  
701 death (Bi et al., 2021). After Flg22 treatment of *Arabidopsis thaliana*, the tonoplast  
702 targeting pump *aca4/11* with double gene knockout showed higher basal Ca<sup>2+</sup> levels and  
703 higher amplitude Ca<sup>2+</sup> signals than wild-type plants (Richard et al., 2020)。 It shows that  
704 calcium transporter can negatively regulate calcium ion influx. The calcium transporter  
705 *AtANN1* in *Arabidopsis thaliana* positively regulates the freezing tolerance of *Arabidopsis*  
706 *thaliana* by affecting the influx of calcium signals mediated by low temperature (Liu et al.,  
707 2021). Calcium transporter-related regulatory genes have positive regulation and negative  
708 regulation of intracellular calcium ion levels to participate in plant defense  
709 responses. Through transcriptome analysis, we found for the first time that calcium  
710 antiporter activity related regulatory genes negatively regulate calcium levels to enhance  
711 cotton resistance to VD.

712

### 713 ***FLiC*-transformed *Arabidopsis* has enhanced resistance to VD**

714 In order to verify whether the *FLiC* gene-transformed *Arabidopsis* can improve the  
715 resistance to VD. Transformation of flagellin gene can improve rice resistance to bacterial  
716 streaks(Wang et al., 2014). The flagellin gene of *Bacillus subtilis* was transferred into rice  
717 to increase the resistance to rice blast and the genetically modified rice leaves produced  
718 allergic reaction spots (Wang et al., 2015). After the *FLiC* gene *Arabidopsis* was inoculated  
719 with VD, the relative expression levels of SA and JA defense signal-related genes *LOX*,  
720 *PAL*, *PRI*, and *VSP* all increased significantly, and the expression levels of *LOX* and *PRI*  
721 both reached 40 times. The expression of genes *GSTU3*, *GPX7* and *POD* related to ROS  
722 and NO signal pathway changed to varying degrees. Therefore, transgenic *Arabidopsis* with  
723 *FLiC* gene can induce the expression of key genes in SA, JA, ROS and NO signaling  
724 pathways to improve plant disease resistance.

725  
726 **Acknowledgments:** This work was financially supported by the National Key R & D  
727 Program of China (2016YFD0102105) and the Postgraduate Research & Practice  
728 Innovation Program of Jiangsu Province (KYCX20\_0582).

729  
730 **Conflict of interest:** The authors declare that they have no conflict of interest.

731  
732 **Author Contributions** Heng Zhou: responsible for the concepts, design, definitions of  
733 intellectual content, literature search, data analysis and manuscript preparation. Yijing Xie:  
734 provided assistance for data acquisition and data analysis. Yi Wang: carried out the  
735 literature search and data acquisition. Heqin Zhu and Canming Tang: performed manuscript  
736 editing and manuscript review. All authors have read and approved the content of the  
737 manuscript.

738

739

740

741

742

743

744

745

746



747 References

748 **Abeles FB, Forrence LE** (1970) Temporal and hormonal control of beta-1, 3-glucanase in *Phaseolus*  
749 *vulgaris* L. *Plant Physiol* **45**: 395–400

750  
751 **Ali MB, Singh N, Shohael AM, et al.** (2006) Phenolics metabolism and lignin synthesis in root  
752 suspension cultures of *Panax ginseng* in response to copper stress[J]. *Plant Science* **171**: 147-154.

753  
754 **Asai T, Tena G, Plotnikova J, et al.** (2002) MAP kinase signaling cascade in *Arabidopsis* innate  
755 immunity. *Nature* **415**: 977-983

756  
757 **Besson-Bard A, Courtois C, Gauthier A, Dahan J, Dobrowolska G, Jeandroz S, Pugin A,**  
758 **Wendehenne D** (2008) Nitric oxide in plants: production and cross-talk with  $Ca^{2+}$  signaling. *Mol Plant*  
759 **1**:218-228

760  
761 **Bi G, Su M, Li N, Liang Y, Dang S, Xu J, Hu M, Wang J, Zou M, Deng Y, Li Q, Huang S, Li J,**  
762 **Chai J, He K, Chen YH, Zhou JM** (2021) The ZAR1 resistosome is a calcium-permeable channel  
763 triggering plant immune signaling. *Cell* **184**:3528-3541

764  
765 **Bouizgarne B, El-Maarouf-Bouteau H, Frankart C, et al.** (2006) Early physiological responses of  
766 *Arabidopsis thaliana* cells to fusaric acid: toxic and signalling effects. *The New Phytologist* **169**:  
767 209-218

768  
769 **Brennan T, Frenkel C** (1977) Involvement of hydrogen peroxide in the regulation of senescence in pear.  
770 *Plant Physiol* **59**: 411–416

771  
772 **Bright J, Desikan R, Hanecek J T, Weir1 S, Neill S J** (2006) ABA induced NO generation and  
773 stomatal closure in *Arabidopsis* are dependent on  $H_2O_2$  synthesis. *The Plant J* **45**:113-122

774  
775 **Buxdorf K, Rahat I, Gafni A, Levy M** (2013) The epiphytic fungus *Pseudozyma aphidis* induces  
776 jasmonic acid- and salicylic acid/nonexpressor of PR1-independent local and systemic resistance. *Plant*  
777 *Physiol* **161**:2014-2022

778  
779 **Chen YL, Huang R, Xiao YM, Lü P, Chen J, Wang XC** (2004) Extracellular calmodulin-induced  
780 stomatal closure is mediated by heterotrimeric G protein and  $H_2O_2$ . *Plant Physiol* **136**: 4096–4103

781  
782 **Daudi A, Cheng Z, O'Brien JA, Mammarella N, Khan S, Ausubel FM, Bolwell GP** (2012) The  
783 apoplastic oxidative burst peroxidase in Arabidopsis is a major component of pattern-triggered immunity.  
784 *Plant Cell* **24**:275-87  
785  
786 **Dickerson DP, Pascholati SF, Hagerman AE, Butler LG, Nicholson RL** (1984) Phenylalanine  
787 ammonia-lyase and hydroxy cinnamate: CoA ligase in maize mesocotyls inoculated with  
788 *Helminthosporium maydis* or *Helminthosporium carbonum*. *Physiol Plant Pathol* **25**: 111–123  
789  
790 **Dixon RA, Harrison MJ, and Lamb CJ** (1994) Early events in the activation of plant defense  
791 responses. *Annual Review of Phytopathology* **32**: 479-501  
792  
793 **Dong H, Li W, Zhang D, et al.** (2003) Differential expression of induced resistance by an aqueous  
794 extract of killed *Penicillium chrysogenum* against *Verticillium* wilt of cotton[J]. *Crop Protection* **22**:  
795 129-134.  
796  
797 **Durrant WE, Dong X**(2004) Systemic acquired resistance. *Annual Review of Phytopathology* **42**:  
798 185-209  
799  
800 **Ebel J, Mithöfer A** (1998) Early events in the elicitation of plant defence. *Planta* **206**: 335-348  
801  
802 **Emani C, Garcia JM, Lopata-Finch E, Pozo MJ, Uribe P, KimDJ, Sunilkumar G, Cook DR,**  
803 **Kenerley CM, Rathore KS** (2003) Enhanced fungal resistance in transgenic cotton expressing an  
804 endochitinase gene from *Trichoderma virens*. *Plant Biotechnol J* **1**: 321–336  
805  
806 **Fan B, Shen L, Liu KL, et al.** (2008) Interaction between nitric oxide and hydrogen peroxide in  
807 postharvest tomato resistance response to *Rhizopus Nigricans*. *J Sci Food Agric* **88**: 1238-1244  
808  
809 **Felix G, DuranJ D, Volko S, et al.** (1999) Plants have a sensitive perception system for the most  
810 conserved domain of bacterial flagellin. *Plant Journal* **18**: 265-276  
811  
812 **Gómez-Gómez L, Boller T** (2000) FLS2: an LRR receptor-like kinase involved in the perception of the  
813 bacterial elicitor flagellin in Arabidopsis. *Molecular Cell* **5**: 1003-1011  
814

- 815 **Han Q** (2014) Screening and identification of cotton anti-VD biocontrol bacteria and research on  
816 disease resistance mechanism. Nanjing: Nanjing Agricultural University  
817
- 818 **Holmes EC, Chen YC, Mudgett MB, Sattely ES.** (2021) Arabidopsis UGT76B1 glycosylates  
819 N-hydroxy-pipecolic acid and inactivates systemic acquired resistance in tomato. *Plant Cell* **33**:750-765  
820
- 821 **Hu HL** (2012) Construction of transgenic VD with GFP gene and study on the process of infecting  
822 cotton. Nanjing Agricultural University  
823
- 824 **Jennings JC, Birkhold PC, Mock NM** (2001) Induction of defense responses in tobacco by the protein  
825 Nep1 from *Fusarium oxysporum*. *The Plant Science* **161**: 891-899  
826
- 827 **Jones JD, Dangl JL** (2006) The plant immune system. *Nature* **444**: 323-329  
828
- 829 **Kumar R, Barua P, Chakraborty N, Nandi AK** (2020) Systemic acquired resistance specific proteome  
830 of *Arabidopsis thaliana*. *Plant Cell Rep* **39**:1549-1563  
831
- 832 **Kumar V, Parkhi V, Kenerley CM, et al.** (2009) Defense-related gene expression and enzyme  
833 activities in transgenic cotton plants expressing an endochitinase gene from *Trichoderma virens* in  
834 response to interaction with *Rhizoctonia solani*. *Planta* **230**: 277-291  
835
- 836 **Lamotte O, Gould K, Lecourieux D, Sequeira-Legrand A, Lebrun -Garcia A, Durner J,**  
837 **Pugin A & Wende-henne D** (2004) Analysis of nitric oxide signaling functions in tobacco cells  
838 challenged by the elicitor cryptogein . *Plant Physiol* **135**: 516-529  
839
- 840 **Li B, Fu Y, Jiang D, Xie J, Cheng J, Li G, Hamid MI, Yi X** (2010) Cyclic GMP as a second  
841 messenger in the nitric oxide-mediated conidiation of the mycoparasite *Coniothyrium minitans*. *Appl*  
842 *Environ Microbiol* **76**: 2830–2836  
843
- 844 **Liu P, Zhang H, Yu B, Xiong L, Xia Y** (2015) Proteomic identification of early salicylate- and  
845 flg22-responsive redox-sensitive proteins in *Arabidopsis*. *Sci Rep* **27**:8625  
846
- 847 **Liu Q, Ding Y, Shi Y, Ma L, Wang Y, Song C, Wilkins KA, Davies JM, Knight H, Knight MR,**  
848 **Gong Z, Guo Y, Yang S** (2021) The calcium transporter ANNEXIN1 mediates cold-induced calcium

- 849 signaling and freezing tolerance in plants. *EMBO J* **40**:e104559  
850
- 851 **Livak KJ, Schmittgen TD** (2001) Analysis of relative gene expression data using real-time quantitative  
852 PCR and the  $2^{-\Delta\Delta CT}$  Method. *Methods* **25**: 402–408  
853
- 854 **Martínez-Medina A, Pescador L, Terrón-Camero LC, Pozo MJ, Romero-Puertas MC** (2019) Nitric  
855 oxide in plant-fungal interactions. *J Exp Bot* **70**:4489-4503  
856
- 857 **Millet Y A, Danna C H, Clay N K, et al.** (2010) Innate immune responses activated in Arabidopsis  
858 roots by microbe-associated molecular patterns. *Plant Cell* **22**: 973-990  
859
- 860 **Naveed ZA, Wei X, Chen J, Mubeen H, Ali GS** (2020) The PTI to ETI Continuum  
861 in Phytophthora-Plant Interactions. *Front Plant Sci* **17**: 593965  
862
- 863 **Nicaise V, Roux M, Zipfel C** (2009) Recent advances in PAMP-triggered immunity against bacteria:  
864 pattern recognition receptors watch over and raise the alarm. *Plant Physiol* **150**: 1638-1647  
865
- 866 **Nürnberg T, Brunner F** (2002) Innate immunity in plants and animals: emerging parallels between  
867 the recognition of general elicitors and pathogen-associated molecular patterns. *Current Opinion in Plant*  
868 *Biology* **5**: 318-324  
869
- 870 **Plazek A, Zur I** (2003) Cold-induced plant resistance to necrotrophic pathogens and antioxidant enzyme  
871 activities and cell membrane permeability. *Plant Sci* **164**: 1019–1028  
872
- 873 **Pomar F, Merino F, Barceló A R** (2002) O-4-Linked coniferyl and sinapyl aldehydes in lignifying cell  
874 walls are the main targets of the Wiesner (phloroglucinol-HCl) reaction. *Protoplasma* **220**: 17-28  
875
- 876 **Qiao M, Sun J, Liu N, Sun T, Liu G, Han S, Hou C, Wang D** (2015) Changes of Nitric Oxide and Its  
877 Relationship with H<sub>2</sub>O<sub>2</sub> and Ca<sup>2+</sup> in Defense Interactions between Wheat and Puccinia Triticina. *PLoS*  
878 *One* **10**:e0132265  
879
- 880 **Ren A, Li MJ, Shi L, Mu DS, Jiang AL, Han Q, Zhao MW** (2013) Profiling and quantifying  
881 differential gene transcription provide insights into ganoderic acid biosynthesis in *Ganoderma lucidum*  
882 in response to methyl jasmonate. *PLoS One* **8**: e65027

- 883
- 884 **Richard Hilleary, Julio Paez-Valencia, Cullen Vens, Masatsugu Toyota, Simon Gilroy** (2020)
- 885 Tonoplast-localized Ca<sup>2+</sup> pumps regulate Ca<sup>2+</sup> signals during pattern-triggered immunity in *Arabidopsis*
- 886 *thaliana*. Proceedings of the National Academy of Sciences **117**:18849-18857
- 887
- 888 **Sang J, Jiang M, Lin F, et al.** (2008) Nitric oxide reduces hydrogen peroxide accumulation involved in
- 889 water stress-induced subcellular antioxidant defense in maize plants. J Integr Plant Biol **50**: 231-243
- 890
- 891 **Sudhakar C, Lakshmi A, Giridarakumar S** (2001) Changes in the antioxidant enzyme efficacy in two
- 892 high yielding. Plant Sci **161**: 613– 619
- 893
- 894 **Sun A, Nie S, Xing D** (2012) Nitric oxide-mediated maintenance of redox homeostasis contributes to
- 895 NPR1-dependent plant innate immunity triggered by Lipopolysaccharides. Plant Physiol **160**:1081–
- 896 1096
- 897
- 898 **Tada Y, Mori T, Shinogi T, Yao N, Takahashi S, Betsuyaku S, Sakamoto M, Park P, Nakayashiki H,**
- 899 **Tosa Y, and Mayama S** (2004) Nitric Oxide and reactive oxygen species do not elicit hypersensitive
- 900 cell death but induce apoptosis in the adjacent cells during the defense response of oat. Mol Plant
- 901 Microbe Interact **17**: 245-253
- 902
- 903 **Takai R, Isogai A, Takayama S, et al.** (2008) Analysis of flagellin perception mediated by Flg22
- 904 receptor OsFLS2 in rice. Molecular Plant-Microbe Interactions **21**: 1635-1642
- 905
- 906 **Takai R., Kaneda T, Isogai A, Takayama S, Che FS** (2007) A new method of defense response
- 907 analysis using a transient expression system in rice protoplasts. Biosci Biotechnol Biochem **71**: 590-593
- 908
- 909 **Thomma BP, Nurnberger T, Joosten MH** (2011) Of PAMPs and effectors: the blurred PTI-ETI
- 910 dichotomy. Plant Cell **23**: 4-15
- 911
- 912 **Thor K, Jiang S, Michard E, et al.** (2020) The calcium-permeable channel OSCA1.3 regulates plant
- 913 stomatal immunity. Nature **585**:569-573
- 914
- 915 **Vandelle E, Poinssot B, Wendehenne D, Bentejac M & Pugin A** (2006) Integrated signalling
- 916 network involving calcium, nitric oxide, and active oxygen species but not mitogen - activated protein

- 917 kinases in BcPG1-elicited grapevine defenses. *Mol Plant Microbe Interact* **19**: 429-440  
918
- 919 **Wang S S, Zhao F Y, Wei X J, et al.** (2013) Preliminary study on Flg22-induced defense response in  
920 female gametophytes in *Saccharina japonica* (Phaeophyta). *Journal of Applied Phycology* **25**: 1215-1223  
921
- 922 **Wang XN** (2014) Study on the infection of cotton leaves and monocots by VD labeled with green  
923 fluorescent protein. Nanjing Agricultural University  
924
- 925 **Wang XY, Chen ZL, Liu WZ, et al.** (2015) Breeding of fla transgenic rice and analysis of disease  
926 resistance spectrum. *Molecular Plant Breeding* **13**:61-65  
927
- 928 **Wang XY, Chen ZY, Liu WZ, et al.** (2014) Resistance to Bacterial Leaf Streak of Transgenic Rice with  
929 Flagellin Gene. *Acta Botanica Northwest* **34**:1534-1539  
930
- 931 **Wang** (2012) A preliminary study on the defense response of kelp induced by Flg22. Ocean University  
932 of China  
933
- 934 **Yan J, Tsuchihara N, Etoh T, et al.** (2007) Reactive oxygen species and nitric oxide are involved in  
935 ABA inhibition of stomatal opening. *Plant Cell Environ* **30**: 1320-1325  
936
- 937 **Yano A, Suzuki K, Uchimiya H, Shinshi H** (1998) Induction of hypersensitive cell death by a fungal  
938 protein in cultures of tobacco cells. *Mol Plant Microbe Interact* **11**: 115-123  
939
- 940 **Yi SY, Kwon SY** (2014) How does SA signaling link the Flg22 responses? *Plant Signal Behav*  
941 **9**:e972806  
942
- 943 **Yi SY, Shirasu K, Moon JS, Lee SG, Kwon SY** (2014) The activated SA and JA signaling pathways  
944 have an influence on flg22-triggered oxidative burst and callose deposition. *PLoS One* **9**:e88951  
945
- 946 **Yuan P, Jewell JB, Behera S, Tanaka K, Poovaiah BW** (2020) Distinct Molecular Pattern-Induced  
947 Calcium Signatures Lead to Different Downstream Transcriptional Regulations via AtSR1/CAMTA3. *Int*  
948 *J Mol Sci* **21**:8163  
949
- 950 **Zhang A, Jiang M, Zhang J, Ding H, Xu SH, Hu X** (2007) Nitric oxide induced by hydrogen peroxide

951 mediates abscisic acid-induced activation of mitogen-activated protein kinase cascade involved in  
952 antioxidant defense in maize leaves. *New Phytol* **175**: 36-50

953

954 **Zipfel C, Robatzek S, Nacarro L, et al.** (2004) Bacterial disease resistance in Arabidopsis through  
955 flagellin perception. *Nature* **428**: 764-767

956

957

958

959

960

961

962

963

964

965

966

967

968

969

970

971

972

973

974

975

976

977

978

979

980



## Parsed Citations

**Abeles FB, Forrence LE (1970) Temporal and hormonal control of beta-1, 3-glucanase in Phaseolus vulgaris L. Plant Physiol 45: 395–400**

Google Scholar: [Author Only](#) [Title Only](#) [Author and Title](#)

**Ali MB, Singh N, Shohael AM, et al. (2006) Phenolics metabolism and lignin synthesis in root suspension cultures of Panax ginseng in response to copper stress[J]. Plant Science 171: 147-154.**

Google Scholar: [Author Only](#) [Title Only](#) [Author and Title](#)

**Asai T, Tena G, Plotnikova J, et al. (2002) MAP kinase signaling cascade in Arabidopsis innate immunity. Nature 415: 977-983**

Google Scholar: [Author Only](#) [Title Only](#) [Author and Title](#)

**Besson-Bard A, Courtois C, Gauthier A, Dahan J, Dobrowolska G, Jeandroz S, Pugin A, Wendehenne D (2008) Nitric oxide in plants: production and cross-talk with Ca<sup>2+</sup> signaling. Mol Plant 1:218-228**

**Bi G, Su M, Li N, Liang Y, Dang S, Xu J, Hu M, Wang J, Zou M, Deng Y, Li Q, Huang S, Li J, Chai J, He K, Chen YH, Zhou JM (2021) The ZAR1 resistosome is a calcium-permeable channel triggering plant immune signaling. Cell 184:3528-3541**

Google Scholar: [Author Only](#) [Title Only](#) [Author and Title](#)

**Bouizgarne B, El-Maarouf-Bouteau H, Frankart C, et al. (2006) Early physiological responses of Arabidopsis thaliana cells to fusaric acid: toxic and signalling effects. The New Phytologist 169: 209-218**

Google Scholar: [Author Only](#) [Title Only](#) [Author and Title](#)

**Brennan T, Frenkel C (1977) Involvement of hydrogen peroxide in the regulation of senescence in pear. Plant Physiol 59: 411–416**

Google Scholar: [Author Only](#) [Title Only](#) [Author and Title](#)

**Bright J, Desikan R, Hanecek J T, Weir S, Neill S J (2006) ABA induced NO generation and stomatal closure in Arabidopsis are dependent on H<sub>2</sub>O<sub>2</sub> synthesis. The Plant J 45:113-122**

Google Scholar: [Author Only](#) [Title Only](#) [Author and Title](#)

**Buxdorf K, Rahat I, Gafni A, Levy M (2013) The epiphytic fungus Pseudozyma aphidis induces jasmonic acid- and salicylic acid/nonexpressor of PR1-independent local and systemic resistance. Plant Physiol 161:2014-2022**

Google Scholar: [Author Only](#) [Title Only](#) [Author and Title](#)

**Chen YL, Huang R, Xiao YM, Lü P, Chen J, Wang XC (2004) Extracellular calmodulin-induced stomatal closure is mediated by heterotrimeric G protein and H<sub>2</sub>O<sub>2</sub>. Plant Physiol 136: 4096–4103**

Google Scholar: [Author Only](#) [Title Only](#) [Author and Title](#)

**Daudi A, Cheng Z, O'Brien JA, Mammarella N, Khan S, Ausubel FM, Bolwell GP (2012) The apoplastic oxidative burst peroxidase in Arabidopsis is a major component of pattern-triggered immunity. Plant Cell 24:275-87**

Google Scholar: [Author Only](#) [Title Only](#) [Author and Title](#)

**Dickerson DP, Pascholati SF, Hagerman AE, Butler LG, Nicholson RL (1984) Phenylalanine ammonia-lyase and hydroxy cinnamate: CoA ligase in maize mesocotyls inoculated with Helminthosporium maydis or Helminthosporium carbonum. Physiol Plant Pathol 25: 111–123**

Google Scholar: [Author Only](#) [Title Only](#) [Author and Title](#)

**Dixon RA, Harrison MJ, and Lamb CJ (1994) Early events in the activation of plant defense responses. Annual Review of Phytopathology 32: 479-501**

Google Scholar: [Author Only](#) [Title Only](#) [Author and Title](#)

**Dong H, Li W, Zhang D, et al. (2003) Differential expression of induced resistance by an aqueous extract of killed Penicillium chrysogenum against Verticillium wilt of cotton[J]. Crop Protection 22: 129-134.**

Google Scholar: [Author Only](#) [Title Only](#) [Author and Title](#)

**Durrant WE, Dong X(2004) Systemic acquired resistance. Annual Review of Phytopathology 42: 185-209**

Google Scholar: [Author Only](#) [Title Only](#) [Author and Title](#)

**Ebel J, Mithöfer A(1998) Early events in the elicitation of plant defence. Planta 206: 335-348**

Google Scholar: [Author Only](#) [Title Only](#) [Author and Title](#)

**Emani C, Garcia JM, Lopata-Finch E, Pozo MJ, Uribe P, KimDJ, Sunilkumar G, Cook DR, Kenerley CM, Rathore KS (2003) Enhanced fungal resistance in transgenic cotton expressing an endochitinase gene from Trichoderma reesei. Plant Biotechnol J 1: 321–336**

Google Scholar: [Author Only](#) [Title Only](#) [Author and Title](#)

**Fan B, Shen L, Liu KL, et al. (2008) Interaction between nitric oxide and hydrogen peroxide in postharvest tomato resistance response to Rhizopus Nigricans. J Sci Food Agric 88: 1238-1244**

Google Scholar: [Author Only](#) [Title Only](#) [Author and Title](#)

**Felix G, Duran J D, Volko S, et al. (1999) Plants have a sensitive perception system for the most conserved domain of bacterial flagellin. Plant Journal 18: 265-276**

Google Scholar: [Author Only](#) [Title Only](#) [Author and Title](#)

- Gómez-Gómez L, Boller T (2000) FLS2: an LRR receptor-like kinase involved in the perception of the bacterial elicitor flagellin in Arabidopsis. Molecular Cell 5: 1003-1011**  
Google Scholar: [Author Only](#) [Title Only](#) [Author and Title](#)
- Han Q (2014) Screening and identification of cotton anti-VD biocontrol bacteria and research on disease resistance mechanism. Nanjing: Nanjing Agricultural University**  
Google Scholar: [Author Only](#) [Title Only](#) [Author and Title](#)
- Holmes EC, Chen YC, Mudgett MB, Sattely ES. (2021) Arabidopsis UGT76B1 glycosylates N-hydroxy-pipecolic acid and inactivates systemic acquired resistance in tomato. Plant Cell 33:750-765**  
Google Scholar: [Author Only](#) [Title Only](#) [Author and Title](#)
- Hu HL (2012) Construction of transgenic VD with GFP gene and study on the process of infecting cotton. Nanjing Agricultural University**  
Google Scholar: [Author Only](#) [Title Only](#) [Author and Title](#)
- Jennings JC, Birkhold PC, Mock NM (2001) Induction of defense responses in tobacco by the protein Nep1 from Fusarium oxysporum. The Plant Science 161: 891-899**  
Google Scholar: [Author Only](#) [Title Only](#) [Author and Title](#)
- Jones JD, Dangl JL (2006) The plant immune system. Nature 444: 323-329**  
Google Scholar: [Author Only](#) [Title Only](#) [Author and Title](#)
- Kumar R, Barua P, Chakraborty N, Nandi AK (2020) Systemic acquired resistance specific proteome of Arabidopsis thaliana. Plant Cell Rep 39:1549-1563**  
Google Scholar: [Author Only](#) [Title Only](#) [Author and Title](#)
- Kumar V, Parkhi V, Kenerley CM, et al. (2009) Defense-related gene expression and enzyme activities in transgenic cotton plants expressing an endochitinase gene from Trichoderma virens in response to interaction with Rhizoctonia solani. Planta 230: 277-291**  
Google Scholar: [Author Only](#) [Title Only](#) [Author and Title](#)
- Lamotte O, Gould K, Lecourieux D, Sequeira-Legrand A, Lebrun -Garcia A, Durner J, Pugin A & Wende-henne D (2004) Analysis of nitric oxide signaling functions in tobacco cells challenged by the elicitor cryptogein . Plant Physiol 135: 516-529**  
Google Scholar: [Author Only](#) [Title Only](#) [Author and Title](#)
- Li B, Fu Y, Jiang D, Xie J, Cheng J, Li G, Hamid MI, Yi X (2010) Cyclic GMP as a second messenger in the nitric oxide-mediated condiation of the mycoparasite Coniothyrium minitans. Appl Environ Microbiol 76: 2830–2836**  
Google Scholar: [Author Only](#) [Title Only](#) [Author and Title](#)
- Liu P, Zhang H, Yu B, Xiong L, Xia Y (2015) Proteomic identification of early salicylate- and flg22-responsive redox-sensitive proteins in Arabidopsis. Sci Rep 27:8625**  
Google Scholar: [Author Only](#) [Title Only](#) [Author and Title](#)
- Liu Q, Ding Y, Shi Y, Ma L, Wang Y, Song C, Wilkins KA, Davies JM, Knight H, Knight MR, Gong Z, Guo Y, Yang S (2021) The calcium transporter ANNEXIN1 mediates cold-induced calcium signaling and freezing tolerance in plants. EMBO J 40:e104559**  
Google Scholar: [Author Only](#) [Title Only](#) [Author and Title](#)
- Livak KJ, Schmittgen TD (2001) Analysis of relative gene expression data using real-time quantitative PCR and the 2- $\Delta\Delta$ CT Method. Methods 25: 402–408**  
Google Scholar: [Author Only](#) [Title Only](#) [Author and Title](#)
- Martínez-Medina A, Pescador L, Terrón-Camero LC, Pozo MJ, Romero-Puertas MC (2019) Nitric oxide in plant-fungal interactions. J Exp Bot 70:4489-4503**  
Google Scholar: [Author Only](#) [Title Only](#) [Author and Title](#)
- Millet Y A, Danna C H, Clay N K, et al. (2010) Innate immune responses activated in Arabidopsis roots by microbe-associated molecular patterns. Plant Cell 22: 973-990**  
Google Scholar: [Author Only](#) [Title Only](#) [Author and Title](#)
- Naveed ZA, Wei X, Chen J, Mubeen H, Ali GS (2020) The PTI to ETI Continuum in Phytophthora-Plant Interactions. Front Plant Sci 17: 593965**  
Google Scholar: [Author Only](#) [Title Only](#) [Author and Title](#)
- Nicaise V, Roux M, Zipfel C (2009) Recent advances in PAMP-triggered immunity against bacteria: pattern recognition receptors watch over and raise the alarm. Plant Physiol 150: 1638-1647**  
Google Scholar: [Author Only](#) [Title Only](#) [Author and Title](#)
- Nürnberg T, Brunner F (2002) Innate immunity in plants and animals: emerging parallels between the recognition of general elicitors and pathogen-associated molecular patterns. Current Opinion in Plant Biology 5: 318-324**  
Google Scholar: [Author Only](#) [Title Only](#) [Author and Title](#)
- Plazek A, Zur I (2003) Cold-induced plant resistance to necrotrophic pathogens and antioxidant enzyme activities and cell membrane permeability. Plant Sci 164: 1019–1028**  
Google Scholar: [Author Only](#) [Title Only](#) [Author and Title](#)

- Pomar F, Merino F, Barceló AR (2002) O-4-Linked coniferyl and sinapyl aldehydes in lignifying cell walls are the main targets of the Wiesner (phloroglucinol-HCl) reaction. *Protoplasma* 220: 17-28  
Google Scholar: [Author Only](#) [Title Only](#) [Author and Title](#)
- Qiao M, Sun J, Liu N, Sun T, Liu G, Han S, Hou C, Wang D (2015) Changes of Nitric Oxide and Its Relationship with H<sub>2</sub>O<sub>2</sub> and Ca<sup>2+</sup> in Defense Interactions between Wheat and *Puccinia Triticina*. *PLoS One* 10:e0132265  
Google Scholar: [Author Only](#) [Title Only](#) [Author and Title](#)
- Ren A, Li MJ, Shi L, Mu DS, Jiang AL, Han Q, Zhao MW (2013) Profiling and quantifying differential gene transcription provide insights into ganoderic acid biosynthesis in *Ganoderma lucidum* in response to methyl jasmonate. *PLoS One* 8: e65027  
Google Scholar: [Author Only](#) [Title Only](#) [Author and Title](#)
- Richard Hilleary, Julio Paez-Valencia, Cullen Vens, Masatsugu Toyota, Simon Gilroy (2020) Tonoplast-localized Ca<sup>2+</sup> pumps regulate Ca<sup>2+</sup> signals during pattern-triggered immunity in *Arabidopsis thaliana*. *Proceedings of the National Academy of Sciences* 117:18849-18857  
Google Scholar: [Author Only](#) [Title Only](#) [Author and Title](#)
- Sang J, Jiang M, Lin F, et al. (2008) Nitric oxide reduces hydrogen peroxide accumulation involved in water stress-induced subcellular antioxidant defense in maize plants. *J Integr Plant Biol* 50: 231-243  
Google Scholar: [Author Only](#) [Title Only](#) [Author and Title](#)
- Sudhakar C, Lakshmi A, Giridarakumar S (2001) Changes in the antioxidant enzyme efficacy in two high yielding. *Plant Sci* 161: 613– 619  
Google Scholar: [Author Only](#) [Title Only](#) [Author and Title](#)
- Sun A, Nie S, Xing D (2012) Nitric oxide-mediated maintenance of redox homeostasis contributes to NPR1-dependent plant innate immunity triggered by Lipopolysaccharides. *Plant Physiol* 160:1081–1096  
Google Scholar: [Author Only](#) [Title Only](#) [Author and Title](#)
- TadaY, Mori T, Shinogi T, Yao N, Takahashi S, Betsuyaku S, Sakamoto M, Park P, Nakayashiki H, Tosa Y, and Mayama S (2004) Nitric Oxide and reactive oxygen species do not elicit hypersensitive cell death but induce apoptosis in the adjacent cells during the defense response of oat. *Mol Plant Microbe Interact* 17: 245-253  
Google Scholar: [Author Only](#) [Title Only](#) [Author and Title](#)
- Takai R, Isogai A, Takayama S, et al. (2008) Analysis of flagellin perception mediated by Flg22 receptor OsFLS2 in rice. *Molecular Plant-Microbe Interactions* 21: 1635-1642  
Google Scholar: [Author Only](#) [Title Only](#) [Author and Title](#)
- Takai R., Kaneda T, Isogai A, Takayama S, Che FS (2007) A new method of defense response analysis using a transient expression system in rice protoplasts. *Biosci Biotechnol Biochem* 71: 590-593  
Google Scholar: [Author Only](#) [Title Only](#) [Author and Title](#)
- Thomma BP, Nurnberger T, Joosten MH (2011) Of PAMPs and effectors: the blurred PTI-ETI dichotomy. *Plant Cell* 23: 4-15  
Google Scholar: [Author Only](#) [Title Only](#) [Author and Title](#)
- Thor K, Jiang S, Michard E, et al. (2020) The calcium-permeable channel OSCA1.3 regulates plant stomatal immunity. *Nature* 585:569-573  
Google Scholar: [Author Only](#) [Title Only](#) [Author and Title](#)
- Vandelle E, Poinssot B, Wendehenne D, Bentejac M & Pugin A (2006) Integrated signalling network involving calcium, nitric oxide, and active oxygen species but not mitogen - activated protein kinases in BcPG1-elicited grapevine defenses. *Mol Plant Microbe Interact* 19: 429-440  
Google Scholar: [Author Only](#) [Title Only](#) [Author and Title](#)
- Wang S S, Zhao F Y, Wei X J, et al. (2013) Preliminary study on Flg22-induced defense response in female gametophytes in *Saccharina japonica* (Phaeophyta). *Journal of Applied Phycology* 25: 1215-1223  
Google Scholar: [Author Only](#) [Title Only](#) [Author and Title](#)
- Wang XN (2014) Study on the infection of cotton leaves and monocots by VD labeled with green fluorescent protein. Nanjing Agricultural University  
Google Scholar: [Author Only](#) [Title Only](#) [Author and Title](#)
- Wang XY, Chen ZL, Liu WZ, et al. (2015) Breeding of fla transgenic rice and analysis of disease resistance spectrum. *Molecular Plant Breeding* 13:61-65  
Google Scholar: [Author Only](#) [Title Only](#) [Author and Title](#)
- Wang XY, Chen ZY, Liu WZ, et al. (2014) Resistance to Bacterial Leaf Streak of Transgenic Rice with Flagellin Gene. *Acta Botanica Northwest* 34:1534-1539  
Google Scholar: [Author Only](#) [Title Only](#) [Author and Title](#)
- Wang (2012) A preliminary study on the defense response of kelp induced by Flg22. Ocean University of China  
Google Scholar: [Author Only](#) [Title Only](#) [Author and Title](#)
- Yan J, Tsuchihara N, Etoh T, et al. (2007) Reactive oxygen species and nitric oxide are involved in ABA inhibition of stomatal opening. *Plant Cell Environ* 30: 1320-1325

Google Scholar: [Author Only](#) [Title Only](#) [Author and Title](#)

**Yano A, Suzuki K, Uchimiya H, Shinshi H (1998) Induction of hypersensitive cell death by a fungal protein in cultures of tobacco cells. Mol Plant Microbe Interact 11: 115-123**

Google Scholar: [Author Only](#) [Title Only](#) [Author and Title](#)

**Yi SY, Kwon SY (2014) How does SA signaling link the Flg22 responses? Plant Signal Behav 9:e972806**

**Yi SY, Shirasu K, Moon JS, Lee SG, Kwon SY (2014) The activated SA and JA signaling pathways have an influence on flg22-triggered oxidative burst and callose deposition. PLoS One 9:e88951**

Google Scholar: [Author Only](#) [Title Only](#) [Author and Title](#)

**Yuan P, Jewell JB, Behera S, Tanaka K, Poovaiah BW (2020) Distinct Molecular Pattern-Induced Calcium Signatures Lead to Different Downstream Transcriptional Regulations via AtSR1/CAMTA3. Int J Mol Sci 21:8163**

Google Scholar: [Author Only](#) [Title Only](#) [Author and Title](#)

**Zhang A, Jiang M, Zhang J, Ding H, Xu SH, Hu X (2007) Nitric oxide induced by hydrogen peroxide mediates abscisic acid-induced activation of mitogen-activated protein kinase cascade involved in antioxidant defense in maize leaves. New Phytol 175: 36-50**

Google Scholar: [Author Only](#) [Title Only](#) [Author and Title](#)

**Zipfel C, Robatzek S, Nacarro L, et al. (2004) Bacterial disease resistance in Arabidopsis through flagellin perception. Nature 428: 764-767**

Google Scholar: [Author Only](#) [Title Only](#) [Author and Title](#)
